# Supplementary material for: Nonverbal synchrony as a behavioural marker of patient and physician race-related attitudes and a predictor of outcomes in oncology interactions: protocol for a secondary analysis of video-recorded cancer treatment discussions
Source: PubMed Central journal article supplement — BMJ Open. 2018 Dec 4;8(12):e023648. doi: 10.1136/bmjopen-2018-023648 (PMC6286484; doi:10.1136/bmjopen-2018-023648), 2018-12-04
Supplement: bmjopen-2018-023648.draft_revisions.pdf [file bmjopen-2018-023648.draft_revisions.pdf]

# BMJ Open

BMJ Open is committed to open peer review. As part of this commitment we make the peer review history of every article we publish publicly available.

When an article is published we post the peer reviewers' comments and the authors' responses online. We also post the versions of the paper that were used during peer review. These are the versions that the peer review comments apply to.

The versions of the paper that follow are the versions that were submitted during the peer review process. They are not the versions of record or the final published versions. They should not be cited or distributed as the published version of this manuscript.

BMJ Open is an open access journal and the full, final, typeset and author-corrected version of record of the manuscript is available on our site with no access controls, subscription charges or pay-per-view fees (<http://bmjopen.bmj.com>).

If you have any questions on BMJ Open's open peer review process please email [info.bmjopen@bmj.com](mailto:info.bmjopen@bmj.com)

# BMJ Open

## Nonverbal synchrony as a behavioral marker of patient and physician race-related attitudes and a predictor of outcomes of oncology interactions: A cross-sectional study of video-recorded cancer treatment discussions

|                               |                                                                                                                                                                                                                                                                                                                                                                                                                      |
|-------------------------------|----------------------------------------------------------------------------------------------------------------------------------------------------------------------------------------------------------------------------------------------------------------------------------------------------------------------------------------------------------------------------------------------------------------------|
| Journal:                      | <i>BMJ Open</i>                                                                                                                                                                                                                                                                                                                                                                                                      |
| Manuscript ID                 | bmjopen-2018-023648                                                                                                                                                                                                                                                                                                                                                                                                  |
| Article Type:                 | Protocol                                                                                                                                                                                                                                                                                                                                                                                                             |
| Date Submitted by the Author: | 16-Apr-2018                                                                                                                                                                                                                                                                                                                                                                                                          |
| Complete List of Authors:     | Hamel, Lauren; Wayne State University/Karmanos Cancer Institute, Oncology<br>Moulder, Robert; University of Virginia, Psychology<br>Albrecht, Terrance; Wayne State University/Karmanos Cancer Institute, Oncology<br>Boker, Steven; University of Virginia, Psychology<br>Eggly, Susan; Wayne State University, Department of Oncology<br>Penner, Louis; Wayne State University/Karmanos Cancer Institute, Oncology |
| Keywords:                     | Disparities, Cancer, Racial discordance, Nonverbal synchrony, Race-related attitudes                                                                                                                                                                                                                                                                                                                                 |
|                               |                                                                                                                                                                                                                                                                                                                                                                                                                      |

SCHOLARONE™  
Manuscripts

1  
2  
3 **Nonverbal synchrony as a behavioral marker of patient and physician race-related**  
4 **attitudes and a predictor of outcomes of oncology interactions: A cross-sectional study**  
5 **of video-recorded cancer treatment discussions**  
6

7  
8 Lauren M. Hamel, PhD

9 Corresponding Author

10 Department of Oncology, School of Medicine  
11 Wayne State University/Karmanos Cancer Institute

12 4100 John R. Mailcode: MM03CB

13 Detroit, MI 48201

14 313-576-9672

15 hamell@karmanos.org  
16

17  
18 Robert Moulder, BS

19 Department of Psychology, University of Virginia

20 P.O. Box 400400 Department of Psychology

21 Charlottesville, VA 22903

22 [rgm4fd@virginia.edu](mailto:rgm4fd@virginia.edu)  
23

24  
25 Terrance L. Albrecht, PhD

26 Department of Oncology, School of Medicine

27 Wayne State University/Karmanos Cancer Institute

28 4100 John R. Mailcode: MM03CB

29 Detroit, MI 48201

30 313-576-8262

31 albrecht@karmanos.org  
32

33  
34 Steven Boker, PhD

35 Department of Psychology, University of Virginia

36 Gilmer Hall Room 102

37 Charlottesville, VA 22903

38 434-218-1248

39 smb3u@virginia.edu  
40

41  
42 Susan Eggly, PhD

43 Department of Oncology, School of Medicine

44 Wayne State University/Karmanos Cancer Institute

45 4100 John R. Mailcode: MM03CB

46 Detroit, MI 48201

47 313-576-8260

48 [egglys@karmanos.org](mailto:egglys@karmanos.org)  
49  
50  
51  
52  
53  
54  
55  
56  
57  
58  
59  
60

1  
2  
3 Louis A. Penner, PhD  
4 Department of Oncology, School of Medicine  
5 Wayne State University/Karmanos Cancer Institute  
6 4100 John R. Mailcode: MM03CB  
7 Detroit, MI 48201  
8 313-576-8261  
9 [pennerl@karmanos.org](mailto:pennerl@karmanos.org)  
10  
11

12 Word count: 6,215  
13  
14  
15  
16  
17  
18  
19  
20  
21  
22  
23  
24  
25  
26  
27  
28  
29  
30  
31  
32  
33  
34  
35  
36  
37  
38  
39  
40  
41  
42  
43  
44  
45  
46  
47  
48  
49  
50  
51  
52  
53  
54  
55  
56  
57  
58  
59  
60

For peer review only

## Abstract

**Introduction:** Racial disparities in cancer treatment contribute to racial mortality disparities. The quality of patient-physician communication during clinical interactions with Black patients (racially discordant) is poorer than communication quality in clinical interactions with White patients (racially concordant). Patient and physician race-related attitudes affect the quality of this communication. These attitudes are likely expressed through subtle nonverbal behaviors; prior research has not examined these behaviors or the ways they are expressed. Nonverbal synchrony, the coordination of physical movement, reflects pre-interaction attitudes *and* predicts participants' post-interaction perceptions of and affect toward one another. We investigate nonverbal synchrony in racially concordant and racially discordant interactions to better understand racial disparities in clinical communication.

**Methods:** Data include racially concordant (n=163) and racially discordant (n= 68) video recorded oncology interactions, patient and oncologist self-reported race-related attitudes, post-visit perceptions of the interaction, and observer ratings of physician's patient-centered communication, and patient and physician affect and rapport. Aim 1 assesses and compares nonverbal synchrony between physicians and patients in racially concordant and racially discordant interactions, using software that can assess nonverbal synchrony. Aim 2 determines the influence of nonverbal synchrony on patient and physician affect and communication in racially concordant and discordant interactions. Aim 3 examines possible causes (i.e., race-related attitudes) and consequences (i.e., negative perceptions) of nonverbal synchrony in racially discordant interactions. Aim 4 develops and tests a mediational model linking physician and patient race-related attitudes to nonverbal synchrony and, in turn, interaction outcomes.

**Analysis:** A hierarchical linear model will model changes in nonverbal synchrony comparing racially concordant or racially discordant interactions. Multilevel structural equation modeling will test proposed mediations.

**Ethics and dissemination:** The parent and current studies are IRB-approved. Since only archival data will be used, ethical or safety risks are low. We will disseminate our findings to communication, psychology, and oncology conferences and journals.

**Key Word: Nonverbal Synchrony; Disparities; Cancer; Racial Discordance; Race-related Attitudes**

**Strengths and limitations of this study:**

- This study explores a channel of communication in medical interactions that has not been previously examined.
- This study utilizes video-recorded cancer treatment discussions of Black and White patients with cancer recorded with state-of-art recording equipment.
- This study utilizes automated behavioral coding software, which introduces less error than traditional methods using human coders.
- This study takes advantage of existing datasets, but the video-recorded and self-report data were not collected with the current hypotheses in mind.
- The data are not evenly distributed by sex and race.

## INTRODUCTION

Racial disparities in cancer mortality and treatment are well documented. In the United States, deaths due to cancer are approximately 20% higher for Blacks than for Whites.<sup>1</sup> This mortality disparity remains even after controlling for stage at diagnosis, disease aggressiveness, obesity, comorbidities, physician access, insurance status, and referrals.<sup>2-6</sup> Importantly, this disparity is greatest for the most treatable cancers.<sup>7</sup> This strongly suggests treatment disparities may contribute to mortality disparities.<sup>8-14</sup> For example, Black cancer patients are less likely to receive chemotherapy for leukemia, breast, lung, and colorectal cancers. If they do receive treatment, it is more likely to be delayed or nonstandard.<sup>2,8,15-23</sup> Although multiple causes of these treatment disparities exist, we focus on two likely contributors: 1) poor patient-physician communication during oncology interactions,<sup>24-30</sup> and 2) race-related attitudes of physicians and patients.<sup>31-42</sup>

Black patients experience poorer quality communication during racially discordant oncology interactions compared to similar interactions with White patients. Due to the small number of Black physicians, especially Black oncologists,<sup>43</sup> about 80% of Black patients' clinical interactions are racially discordant (Black patients, non-Black physicians).<sup>44</sup> Patient-physician communication is often of poorer quality in racially discordant clinical interactions than racially concordant ones. Patients in racially discordant interactions tend to ask fewer questions<sup>25</sup> and are less likely to participate in decision making;<sup>45</sup> whereas physicians tend to be less patient-centered;<sup>46,47</sup> more verbally dominant;<sup>47</sup> more contentious;<sup>48</sup> exhibit fewer rapport building nonverbal behaviors;<sup>49</sup> and provide less information.<sup>27</sup> Physicians and patients show fewer expressions of positive affect<sup>47</sup> and relationship-building attempts.<sup>29</sup>

1  
2  
3 Patient and physician race-related attitudes affect interaction outcomes via communication  
4 behaviors. Prior research, including our own, suggests that *race-related attitudes* (e.g., physician  
5 implicit bias against Blacks; patient suspicion of medical care Blacks receive) affect  
6 communication in clinical interactions and perceptions physicians and patients have of each  
7 other during racially discordant clinical interactions.<sup>31-33,37,38</sup> For example, physicians with higher  
8 levels of implicit (nonconscious) bias against Blacks are perceived as less patient centered and  
9 less trustworthy by their Black patients.<sup>31,40,41,50</sup> Our prior research suggests such perceptions and  
10 behaviors are associated with less positive patient expectations about recommended treatments.<sup>51</sup>  
11 We have also found that Black patients with higher levels of suspicion of medical care are less  
12 optimistic about outcomes of recommended treatments and are perceived by their physicians to  
13 be less educated.<sup>52,53</sup> This, in turn, is associated with less positive physician expectations about  
14 how their Black patients will do on a treatment protocol, such as their adherence and/or ability to  
15 tolerate treatment. Given that these attitudes are not directly observable, the only possible way in  
16 which they can affect perceptions and expectations is through their impact on communication  
17 behaviors.

18  
19  
20  
21  
22  
23  
24  
25  
26  
27  
28  
29  
30  
31  
32  
33  
34  
35  
36  
37  
38 Relatively little is known about *how* race-related attitudes are manifested in communication  
39 behaviors during oncology interactions or the effects of communication on interaction outcomes.  
40 Our own and others' research has shown that non-Black physicians' nonconscious race-related  
41 attitudes (i.e., implicit racial bias) influence their communication with Black patients.<sup>51,54-56</sup>  
42 Studies of nonmedical interracial interactions find that implicit bias is more likely to be  
43 expressed through less deliberate nonverbal communication (e.g., facial expressions, posture)  
44 than through more deliberate verbal communication (i.e., spoken words).<sup>57-60</sup> Black patients'  
45 communication may be driven more by explicit than implicit race-related attitudes,<sup>61</sup> but its  
46  
47  
48  
49  
50  
51  
52  
53  
54  
55  
56  
57  
58  
59  
60



1  
2  
3 expression also seems to be subtle and involve less deliberate communication (e.g., nonverbal  
4 behaviors). The behavioral channels through which these race-related attitudes are expressed are  
5  
6 not known, but nonverbal synchrony is a promising candidate as one of them.  
7  
8  
9

10 Considerable prior research shows that nonverbal synchrony, or the coordination of  
11 physical movement that occurs between individuals during an interaction,<sup>62</sup> is often  
12 nonconscious, unintentional, and effortless.<sup>63-65</sup> However, nonverbal synchrony can be predicted  
13 by pre-interaction attitudes<sup>66</sup> and has post-interaction consequences.<sup>67</sup> People synchronize more  
14 with others with whom they have positive relationships,<sup>68</sup> those with whom they want to develop  
15 positive relationships,<sup>69</sup> and others whom they trust.<sup>66</sup> In a recent experimental lab-based study,  
16 individuals with higher implicit bias synchronized more with an avatar of their own race than  
17 with an avatar of a different race.<sup>70</sup> In terms of nonverbal synchrony's role as a predictor,  
18 nonverbal synchrony reflects more subsequent positive affect and liking,<sup>67</sup> perceptions of  
19 similarity, closeness, and rapport with the interaction partner.<sup>66,71,72</sup> More relevant to clinical  
20 communication, nonverbal synchrony has been found to positively influence therapeutic  
21 processes,<sup>73</sup> cooperation,<sup>74</sup> obedience,<sup>72</sup> and memory for information provided by the interaction  
22 partner.<sup>75,76</sup>  
23  
24  
25  
26  
27  
28  
29  
30  
31  
32  
33  
34  
35  
36  
37  
38  
39

40 In sum: we know that Black patients and non-Black physicians react to each other's race-  
41 related attitudes. We know that these attitudes are likely subtly manifested in communication.  
42 Little is known, however, about the channels through which these attitudes are communicated.  
43 Because nonverbal synchrony is subtle, unintentional, automatic and affect-laden, it may likely  
44 serve as a behavioral marker of race-related attitudes. The current study will help fill this gap in  
45 understanding by examining the role of nonverbal synchrony in racially concordant and racially  
46 discordant oncology interactions.  
47  
48  
49  
50  
51  
52  
53  
54  
55  
56  
57  
58  
59  
60

1  
2  
3 The study was designed to achieve the following *aims* and *hypotheses*:  
4

5 Aim 1: Assess and compare nonverbal synchrony between physicians and patients in  
6 racially concordant and racially discordant oncology interactions.  
7

8 Hypothesis 1: Nonverbal synchrony will be greater in racially concordant than in  
9 racially discordant oncology interactions.  
10

11 Aim 2: Determine the influence of nonverbal synchrony on physician communication  
12 style (e.g., patient centered) and patient and physician affect in racially concordant and  
13 racially discordant oncology interactions.  
14

15 Hypothesis 2: Nonverbal synchrony will influence physician patient-centered  
16 communication, patient and physician affect, and relational rapport in racially  
17 concordant and racially discordant clinical interactions.  
18

19 Aim 3: Examine the antecedents and outcomes of nonverbal synchrony in racially  
20 discordant oncology interactions.  
21

22 Hypothesis 3: In the racially discordant oncology interactions, nonverbal  
23 synchrony will significantly negatively covary with patient post-interaction  
24 distress and positively covary with 1) patient post-interaction perceptions of  
25 physicians' patient-centered communication and treatment expectations, 2)  
26 physicians' post-interaction perceptions of patient personal characteristics (e.g.,  
27 understanding of treatment options), and their responses to treatment (e.g.,  
28 willingness to follow treatment regimen), and 3) observers' ratings of physician  
29 patient-centered communication, patient and physician affect, and relational  
30 rapport.  
31  
32  
33  
34  
35  
36  
37  
38  
39  
40  
41  
42  
43  
44  
45  
46  
47  
48  
49  
50  
51  
52  
53  
54  
55  
56  
57  
58  
59  
60

1  
2  
3 Hypothesis 4: Nonverbal synchrony will significantly covary with pre-interaction  
4 race-related attitudes of the patient and physicians (e.g. physician implicit bias;  
5 patient suspicion).  
6  
7  
8  
9

10 Aim 4: Develop and test a mediational model that links physician and patient race-related  
11 attitudes to nonverbal synchrony and, in turn, outcomes of racially discordant oncology  
12 interactions.  
13  
14  
15

16  
17 Hypothesis 5: Nonverbal synchrony will mediate the relationship between pre-  
18 interaction race-related attitudes and post-interaction perceptions of the patients  
19 and physicians.  
20  
21  
22  
23  
24

## 25 **METHODS AND ANALYSIS**

26  
27 **Overview of proposed study.** Our goals are to: 1) compare the extent to which physicians and  
28 patients synchronize their behavior in racially concordant and racially discordant oncology  
29 interactions, 2) compare the associations between nonverbal synchrony and self-report and  
30 observational measures of patient and physician affect and physicians' patient-centered  
31 communication in racially concordant and racially discordant oncology interactions, 3)  
32 investigate how race-related attitudes (e.g., physician implicit bias; patient suspicion) affect  
33 nonverbal synchrony in racially discordant oncology interactions, 4) investigate how nonverbal  
34 synchrony affects the outcomes of racially discordant clinical interactions, and 5) test the  
35 conceptual model in Figure 1, which predicts that race-related attitudes will be associated with  
36 patient and physician perceptions and treatment-related outcomes of racially discordant oncology  
37 interactions, through their influence on nonverbal synchrony. To achieve these goals, we will  
38 conduct a secondary analysis of data from two studies conducted by members of our study team.  
39  
40  
41  
42  
43  
44  
45  
46  
47  
48  
49  
50  
51  
52  
53

54 **Study One**, conducted at two NCI-designated comprehensive cancer centers (R01CA75003),<sup>77</sup>  
55  
56  
57  
58  
59

1  
2  
3 was an investigation of how patient-oncologist communication influences patients' decision  
4 making about treatment including clinical trials. **Study Two**, conducted at one of the **Study One**  
5 NCI-designated centers plus another large urban cancer clinic, investigated associations between  
6 communication and outcomes during racially discordant oncology interactions (U54CA153606-  
7 04).<sup>78 78</sup> Patients and oncologists from both studies who agreed to secondary analyses of their  
8 recordings will be used in the current study. Comparisons of groups did not find any socio-  
9 demographic or attitudinal differences between patients/oncologists who did and did not agree to  
10 be in secondary analyses.

### 21 **Data Sources.**

22 *Participants, Procedures, and Measures in Study One.* Patients from **Study One** who are in the  
23 current study include 163 self-identified White (92 male; 71 female) patients who saw a non-  
24 Black medical oncologist to discuss treatment. Prior to meeting their oncologist, patients  
25 completed a survey assessing their sociodemographic characteristics. Exam rooms were  
26 equipped with unobtrusive digital audio and video recording devices; studies have demonstrated  
27 the nonreactance to the recording process,<sup>79</sup> and enhanced validity compared to audio recording  
28 alone.<sup>80</sup> Oncologists were 22 non-Black male medical oncologists (no female oncologists  
29 participated in **Study One**) video recorded in at least one interaction ( $M = 7.4$   $SD = 7.0$ ). Upon  
30 enrollment, oncologists completed a demographic survey.

31 *Participants, Procedures, and Measures in Study Two.* Patients from **Study Two** who are in the  
32 current study include 68 Black female patients who saw a non-Black medical oncologist to  
33 discuss treatment. Only 6 of the patients in Study Two were males, thus, they will be excluded  
34 from this study. Oncologists are 13 (7 females; 6 males) non-Black medical oncologists who  
35 were video recorded in at least one interaction ( $M = 5.2$ ,  $SD = 6.4$ ).

1  
2  
3 *Measures:* At baseline, patients provided sociodemographic information and completed measures  
4 of suspicion of medical care Black patients receive<sup>34</sup> and trust in physicians.<sup>81</sup> At baseline,  
5 oncologists completed a demographic survey and completed the Implicit Association Test (IAT),  
6 which assesses implicit racial bias against Black people.<sup>82</sup> The video-recorded clinical interactions  
7 interactions took place several weeks later. Immediately after the interactions, patients completed  
8 measures of distress, perception of the physicians' patient-centered communication, and  
9 expectations about recommended treatment. Also, immediately after interactions, oncologists  
10 completed measures of perceptions of the patient and how well the patient would do in treatment.  
11 One week later, patients reported their level of trust in their oncologist in a telephone survey.  
12 Trained observers later observed and rated video recorded interactions to assess physicians'  
13 patient-centered communication.<sup>48</sup> At least two observers rated physician communication; inter-  
14 rater reliability was acceptable (ICC = .57-.74,  $p$ 's<.05). Each physician's patient centeredness  
15 score was the average of multiple observer ratings.  
16  
17  
18  
19  
20  
21  
22  
23  
24  
25  
26  
27  
28  
29  
30  
31  
32

33 Five one-minute video slices were created from each of the recordings (N = 340 slices)  
34 by dividing each video recording into five equal segments and selecting the first minute from  
35 each segment.<sup>57,83-85</sup> The slices were rated by naïve observers for patient and physician affect  
36 (e.g. warm/friendly,) and relational rapport (e.g. attentive).  
37  
38  
39  
40  
41  
42  
43

### 44 **Hypotheses and Data Analysis.**

45 **Aim 1: Assess and compare nonverbal synchrony between physicians and patients in**  
46 **racially concordant and racially discordant oncology interactions.** We will achieve this aim  
47 by first matching video recordings from **Study One** and **Study Two** on patient and physician sex  
48 and other sociodemographics. Although our focus is on racial concordance/discordance, prior  
49 research suggests that patient and physician sex affects communication in medical interactions.<sup>86-</sup>  
50  
51  
52  
53  
54  
55  
56  
57  
58  
59  
60

1  
2  
3<sup>90</sup> However, as described above, matching on sex is constrained by the distributions in the  
4 original recordings. Thus, from **Study One**, we will use 71 White female patients and 92 White  
5 male patients who interacted with male non-Black physicians. From **Study Two**, we will use the  
6 34 Black female patient-non-Black male physician dyads and 34 Black female patient-non-Black  
7 female physician interactions. Thus, within race concordant and race discordant interactions we  
8 will examine the effects of sex concordance and discordance. We acknowledge that this is not a  
9 full factorial design, but it will permit us to examine the influence of race  
10 concordance/discordance on nonverbal synchrony and, also partially examine whether the  
11 influence of race on nonverbal synchrony is moderated by patient and physician sex. To  
12 minimize any other differences between Black and White patients, we will also do block  
13 matching of patients from **Study One** with patients from **Study Two** on characteristics that  
14 might affect nonverbal communication (e.g., age, type of cancer). We expect this matching will  
15 reduce the number of patients available from **Study One** by 20-30% percent, but sufficient cases  
16 will be available for well-powered analyses of racial concordance/discordance. We will then  
17 further the equivalence of patients with advanced methods of propensity scoring.<sup>91-93</sup>

18  
19 We will assess nonverbal synchrony in all matched interactions using customized Motion  
20 Energy Analysis (MEA; <http://psync.ch/?p=9>)<sup>73,94</sup> software to obtain a synchrony index for each  
21 interaction. Figure 2 is a screenshot of MEA. MEA is an objective automated method that  
22 continuously monitors the amount of movement occurring in pre-defined regions of  
23 interest.<sup>73,95,96</sup> MEA captures frame-by-frame movement and provides quantification of change  
24 in movement in the regions of interest. We consider each individual as one region of interest to  
25 capture full body movement. MEA uses pixel-differencing methods to measure total amount of  
26 movement. We will quantify nonverbal synchrony by deriving scores using windowed cross-

1  
2  
3 correlation (WCC) matrices to obtain a synchrony index for each interaction.<sup>97</sup> Nonverbal  
4  
5 synchronization of interaction tends to ebb and flow during conversations and thus is  
6  
7 nonstationary.<sup>91</sup> WCC accounts for the possibility of nonstationary synchronization when  
8  
9 comparing two time series by comparing small sections of the time series at a time at different  
10  
11 time lags. Figure 3 is WCC output displayed as a heat map with warmer colors representing  
12  
13 strong positive correlations between the two individuals' behavior and cooler colors representing  
14  
15 strong negative correlations. These scores are dyadic attributes that represent amounts and  
16  
17 relationships of synchronous movement within dyads. Then we will compare (a) effects of race  
18  
19 concordance versus discordance on nonverbal synchrony and (b) effects of sex concordance  
20  
21 versus discordance on nonverbal synchrony, and (c) determine the relative impact of race  
22  
23 concordance/discordance versus sex concordance/discordance on nonverbal synchrony.  
24  
25  
26  
27

28 *Hypothesis 1: Nonverbal synchrony will be greater in racially concordant than in racially*  
29 *discordant oncology interactions.* To obtain time varying synchrony scores, we will block each  
30  
31 interaction into five equal segments and obtain synchrony indices for each segment using MEA.  
32  
33 This procedure also allows us to adjust for patients and physicians moving outside of the regions  
34  
35 of interest set at the beginning of each segment and maximizes the likelihood that we capture all  
36  
37 patient and physician movement. To model changes in dynamic and overall levels of synchrony,  
38  
39 we will use structural equation modeling (SEM) methods, latent differential equations (LDE),  
40  
41 and multi-level modeling (MLM) methods. LDE is a special case of SEM that allows for  
42  
43 estimation of parameters of a proposed underlying dynamical system. LDE models contain  
44  
45 parameters pertaining to the dynamics of a given system (e.g., “eta” and “zeta” parameters of a  
46  
47 latent harmonic oscillator model). We will use multi-group SEM modeling to test for differences  
48  
49 in these parameters between racially concordant and racially discordant interactions. By using a  
50  
51  
52  
53  
54  
55  
56  
57  
58  
59

1  
2  
3 likelihood ratio test comparing two models where 1) these dynamic parameters are free to vary  
4 and 2) where these parameters are constrained to be equal across models, we will be able to  
5  
6 determine if the motion dynamics differ between racially concordant and racially discordant  
7 interactions. Using a three-level HLM model with time segments (level-1) nested within patient  
8 (level-2), and patient nested within physician (level-3), we will model changes in nonverbal  
9 synchrony based on a categorical variable modeling either racially concordant or racially  
10 discordant interactions. Assuming 168 dyads, an alpha of .05, a correlation coefficient of .1, and  
11 a linear time effect, we have a power of .8 to detect a medium effect size of .50.  
12  
13  
14  
15  
16  
17  
18  
19  
20

21 **Aim 2: Determine the influence of nonverbal synchrony on physician communication and**  
22 **patient and physician affect in racially concordant and racially discordant oncology**  
23 **interactions.** We will first collect the same observational measures for **Study One** as in **Study**  
24 **Two.** Trained research assistants will rate each of the racially concordant interactions on  
25 physicians' patient-centered communication.<sup>48</sup> Next, we will create thin slices of the interactions  
26 from **Study One** – naïve observers will rate the slices using the same measures of physician-  
27 patient affect and rapport as in **Study Two.** Then we will use the synchrony indices from Aim 1  
28 to compare the relationship between nonverbal synchrony and patient-physician affect and  
29 rapport in racially concordant and discordant interactions.  
30  
31  
32  
33  
34  
35  
36  
37  
38  
39  
40  
41

42 *Hypothesis 2: Nonverbal synchrony will influence physician patient-centered communication,*  
43 *patient and physician affect, and relational rapport in racially concordant and racially*  
44 *discordant clinical interactions.* We will use MLM and multi-group SEM to create a mediation  
45 model where nonverbal synchrony will predict level-2 (patient) and level-3 (physician)  
46 outcomes. Assuming 168 dyads, an alpha of .05, and a correlation coefficient of .1, we have  
47 power of .8 to detect an effect size of .48.  
48  
49  
50  
51  
52  
53  
54  
55  
56  
57  
58  
59  
60



1  
2  
3 **Aim 3: Examine the antecedents and outcomes of nonverbal synchrony in racially**  
4 **discordant oncology interactions.** We will achieve this aim using the synchrony indices from  
5  
6 the racially discordant interactions in **Study Two**. We will examine the relationships between  
7  
8 nonverbal synchrony and: 1) interaction outcomes including: patient satisfaction, distress,  
9  
10 perception of physicians' patient-centered communication, and treatment expectations, and  
11  
12 physician perceptions of the patient (e.g., willingness to follow treatment regimen), and 2) pre-  
13  
14 interaction physician and patient race-related attitudes (e.g., implicit bias; suspicion).  
15  
16  
17  
18

19 *Hypothesis 3: In the racially discordant oncology interactions, nonverbal synchrony will*  
20 *significantly negatively covary with patient post-interaction distress and positively covary with*  
21 *1) patient post-interaction perceptions of physicians' patient-centered communication and*  
22 *treatment expectations, 2) physicians' post-interaction perceptions of patient personal*  
23 *characteristics (e.g., understanding of treatment options), and their responses to treatment (e.g.,*  
24 *willingness to follow treatment regimen), and 3) observers' ratings of physician patient-centered*  
25 *communication, patient and physician affect, and relational rapport.* Using LDE, we will model  
26  
27 dynamic parameter values of the fluctuations in nonverbal synchrony over the course of each  
28  
29 interaction. These values will then be used as first level predictors in a MLM model. The second  
30  
31 level predictors for this model will be values associated with physician and patient post  
32  
33 interaction perceptions of the interaction and of each other. Assuming 68 dyads, an alpha of .05,  
34  
35 and a correlation coefficient of .1, we have a power of .9 to detect an effect size of .56.  
36  
37  
38  
39  
40  
41  
42  
43  
44  
45

46 *Hypothesis 4: Nonverbal synchrony will significantly covary with pre-interaction race-related*  
47 *attitudes of the patient and physicians (e.g. physician implicit bias; patient suspicion).* We will  
48  
49 create a three-level MLM. We will model synchrony assessed over five time segments nested  
50  
51  
52  
53  
54  
55  
56  
57  
58  
59  
60

1  
2  
3 within each patient and each patient nested within physician. Each patient-physician dyad will  
4  
5 have its own average synchrony score.  
6

7  
8 **Aim 4: Develop and test a mediational model that links physician and patient race-related**  
9  
10 **attitudes to nonverbal synchrony and, in turn, outcomes of race-related discordant**  
11 **oncology interactions.**  
12  
13

14  
15 *Hypothesis 5: Nonverbal synchrony will mediate the relationship between pre-interaction race-*  
16 *related attitudes and post-interaction perceptions of the patients and physicians.* To examine the  
17 proposed mediations in a multilevel context, we will utilize multi-level SEM, as described by  
18 Preacher and colleagues.<sup>98,99</sup> These models address potential conflated estimates of mediated  
19 effects that can arise when using multi-level data. Time segments will be nested within each  
20 patient and each patient will be nested within physician, with synchrony varying at each time  
21 point. We will use a single mediation model to assess how physician and patient race-related  
22 attitudes impact interaction outcomes via their impact on nonverbal synchrony.  
23  
24  
25  
26  
27  
28  
29  
30  
31  
32

### 33 **ETHICS AND DISSEMINATION**

34

35  
36  
37  
38  
39  
40  
41  
42  
43  
44  
45  
46  
47  
48  
49  
50  
51  
52  
53  
54  
55  
56  
57  
58  
59  
60

Studies one, two, and the current study are all IRB-approved. Only patients and physicians from the previous studies who provided their consent for secondary analyses of their data were include in the current study. The nature of the data make it unlikely we will encounter ethical or safety issues.

We will submit our ongoing findings to relevant communication, social psychology, and oncology conferences. Similarly, we plan to submit the final manuscripts to high-impact communication, social psychology, and oncology peer-reviewed journals.

## REFERENCES

1. Statistics National Center for Health Statistics. *Health, United States, 2015: with special feature on racial and ethnic health disparities*. Hyattsville, MD2016.
2. Murphy CC, Harlan LC, Warren JL, Geiger AM. Race and Insurance Differences in the Receipt of Adjuvant Chemotherapy Among Patients With Stage III Colon Cancer. *J Clin Oncol*. 2015;33(23):2530-2536.
3. Bach PB, Schrag D, Brawley OW, Galaznik A, Yakren S, Begg CB. Survival of blacks and whites after a cancer diagnosis. *JAMA*. 2002;287(16):2106-2113.
4. Greenwald HP, Polissar NL, Borgatta EF, McCorkle R, Goodman G. Social factors, treatment, and survival in early-stage non-small cell lung cancer. *Am J Public Health*. 1998;88(11):1681-1684.
5. Ramsey SD, Howlader N, Etzioni RD, Donato B. Chemotherapy use, outcomes, and costs for older persons with advanced non-small-cell lung cancer: evidence from surveillance, epidemiology and end results-Medicare. *J Clin Oncol*. 2004;22(24):4971-4978.
6. Smedley BD, Stith AY, Nelson AR. *Unequal treatment: confronting racial and ethnic disparities in health care*. . Institute of Medicine;2003.
7. Tehranifar P, Neugut AI, Phelan JC, et al. Medical advances and racial/ethnic disparities in cancer survival. *Cancer Epidemiol Biomarkers Prev*. 2009;18(10):2701-2708.
8. Patel MI, Ma Y, Mitchell B, Rhoads KF. How do differences in treatment impact racial and ethnic disparities in acute myeloid leukemia? *Cancer Epidemiol Biomarkers Prev*. 2015;24(2):344-349.
9. Ward E, Jemal A, Cokkinides V, et al. Cancer disparities by race/ethnicity and socioeconomic status. *CA Cancer J Clin*. 2004;54(2):78-93.
10. Ghafoor A, Jemal A, Ward E, Cokkinides V, Smith R, Thun M. Trends in breast cancer by race and ethnicity. *CA Cancer J Clin*. 2003;53(6):342-355.
11. Jemal A, Siegel R, Ward E, et al. Cancer statistics, 2006. *CA Cancer J Clin*. 2006;56(2):106-130.
12. Siegel R, Ma J, Zou Z, Jemal A. Cancer statistics, 2014. *CA Cancer J Clin*. 2014;64(1):9-29.
13. Hardy D, Liu CC, Xia R, et al. Racial disparities and treatment trends in a large cohort of elderly black and white patients with nonsmall cell lung cancer. *Cancer*. 2009;115(10):2199-2211.
14. Quality AfHRA. *2014 National Healthcare Quality and Disparities Report*. Rockville, MD. 2015.
15. Griggs JJ, Sorbero ME, Stark AT, Heining SE, Dick AW. Racial disparity in the dose and dose intensity of breast cancer adjuvant chemotherapy. *Breast Cancer Res Treat*. 2003;81(1):21-31.
16. Morris AM, Billingsley KG, Hayanga AJ, Matthews B, Baldwin LM, Birkmeyer JD. Residual treatment disparities after oncology referral for rectal cancer. *J Natl Cancer Inst*. 2008;100(10):738-744.
17. Berger M, Lund MJ, Brawley OW. Racial disparities in lung cancer. *Curr Probl Cancer*. 2007;31(3):202-210.

18. Daly B, Olopade OI. A perfect storm: How tumor biology, genomics, and health care delivery patterns collide to create a racial survival disparity in breast cancer and proposed interventions for change. *CA Cancer J Clin*. 2015;65(3):221-238.
19. Hayn MH, Orom H, Shavers VL, et al. Racial/ethnic differences in receipt of pelvic lymph node dissection among men with localized/regional prostate cancer. *Cancer*. 2011;117(20):4651-4658.
20. Penner LA, Eggly S, Griggs JJ, Underwood W, 3rd, Orom H, Albrecht TL. Life-Threatening Disparities: The Treatment of Black and White Cancer Patients. *J Soc Issues*. 2012;68(2).
21. Meghani SH, Kang Y, Chittams J, McMenamin E, Mao JJ, Fudin J. African Americans with cancer pain are more likely to receive an analgesic with toxic metabolite despite clinical risks: a mediation analysis study. *J Clin Oncol*. 2014;32(25):2773-2779.
22. Hassett MJ, Schymura MJ, Chen K, Boscoe FP, Gesten FC, Schrag D. Variation in breast cancer care quality in New York and California based on race/ethnicity and Medicaid enrollment. *Cancer*. 2015.
23. Phelan JC, Link BG. Is Racism a Fundamental Cause of Inequalities in Health? *Annual Review of Sociology, Vol 41*. 2015;41:311-330.
24. Jean-Pierre P, Fiscella K, Griggs J, et al. Race/ethnicity-based concerns over understanding cancer diagnosis and treatment plan. *J Natl Med Assoc*. 2010;102(3):184-189.
25. Eggly S, Harper FW, Penner LA, Gleason MJ, Foster T, Albrecht TL. Variation in question asking during cancer clinical interactions: a potential source of disparities in access to information. *Patient Educ Couns*. 2011;82(1):63-68.
26. Eggly S, Barton E, Winckles A, Penner LA, Albrecht TL. A disparity of words: racial differences in oncologist-patient communication about clinical trials. *Health Expect*. 2015;18(5):1316-1326.
27. Gordon HS, Street RL, Jr., Sharf BF, Soucek J. Racial differences in doctors' information-giving and patients' participation. *Cancer*. 2006;107(6):1313-1320.
28. Gordon HS, Street RL, Jr., Sharf BF, Kelly PA, Soucek J. Racial differences in trust and lung cancer patients' perceptions of physician communication. *J Clin Oncol*. 2006;24(6):904-909.
29. Siminoff LA, Graham GC, Gordon NH. Cancer communication patterns and the influence of patient characteristics: disparities in information-giving and affective behaviors. *Patient Educ Couns*. 2006;62(3):355-360.
30. Song L, Hamilton JB, Moore AD. Patient-healthcare provider communication: perspectives of African American cancer patients. *Health Psychol*. 2012;31(5):539-547.
31. Penner LA, Dovidio JF, West TV, et al. Aversive Racism and Medical Interactions with Black Patients: A Field Study. *J Exp Soc Psychol*. 2010;46(2):436-440.
32. Boulware LE, Cooper LA, Ratner LE, LaVeist TA, Powe NR. Race and trust in the health care system. *Public Health Rep*. 2003;118(4):358-365.
33. Nguyen GC, LaVeist TA, Harris ML, Datta LW, Bayless TM, Brant SR. Patient trust-in-physician and race are predictors of adherence to medical management in inflammatory bowel disease. *Inflamm Bowel Dis*. 2009;15(8):1233-1239.
34. Thompson HS, Valdimarsdottir HB, Winkel G, Jandorf L, Redd W. The Group-Based Medical Mistrust Scale: psychometric properties and association with breast cancer screening. *Prev Med*. 2004;38(2):209-218.

- 1
- 2
- 3 35. Bird ST, Bogart LM. Perceived race-based and socioeconomic status(SES)-based
- 4 discrimination in interactions with health care providers. *Ethn Dis*. 2001;11(3):554-563.
- 5 36. Bird ST, Bogart LM, Delahanty DL. Health-related correlates of perceived discrimination
- 6 in HIV care. *AIDS Patient Care STDS*. 2004;18(1):19-26.
- 7 37. O'Malley AS, Sheppard VB, Schwartz M, Mandelblatt J. The role of trust in use of
- 8 preventive services among low-income African-American women. *Prev Med*.
- 9 2004;38(6):777-785.
- 10 38. Green AR, Carney DR, Pallin DJ, et al. Implicit bias among physicians and its prediction
- 11 of thrombolysis decisions for black and white patients. *J Gen Intern Med*.
- 12 2007;22(9):1231-1238.
- 13 39. Hagiwara N, Penner LA, Gonzalez R, et al. Racial attitudes, physician-patient talk time
- 14 ratio, and adherence in racially discordant medical interactions. *Soc Sci Med*.
- 15 2013;87:123-131.
- 16 40. Cooper LA, Roter DL, Carson KA, et al. The associations of clinicians' implicit attitudes
- 17 about race with medical visit communication and patient ratings of interpersonal care. *Am*
- 18 *J Public Health*. 2012;102(5):979-987.
- 19 41. Blair IV, Steiner JF, Fairclough DL, et al. Clinicians' implicit ethnic/racial bias and
- 20 perceptions of care among Black and Latino patients. *Ann Fam Med*. 2013;11(1):43-52.
- 21 42. Hausmann LR, Myaskovsky L, Niyonkuru C, et al. Examining implicit bias of physicians
- 22 who care for individuals with spinal cord injury: A pilot study and future directions. *J*
- 23 *Spinal Cord Med*. 2015;38(1):102-110.
- 24 43. Hamel LM, Chapman R, Malloy M, et al. Critical Shortage of African American Medical
- 25 Oncologists in the United States. *J Clin Oncol*. 2015;33(32):3697-3700.
- 26 44. Kirkwood MK, Kosty MP, Bajorin DF, Bruinooge SS, Goldstein MA. Tracking the
- 27 workforce: the American Society of Clinical Oncology workforce information system. *J*
- 28 *Oncol Pract*. 2013;9(1):3-8.
- 29 45. Cooper-Patrick L, Gallo JJ, Gonzales JJ, et al. Race, gender, and partnership in the
- 30 patient-physician relationship. *JAMA*. 1999;282(6):583-589.
- 31 46. Cooper LA, Roter DL, Johnson RL, Ford DE, Steinwachs DM, Powe NR. Patient-
- 32 centered communication, ratings of care, and concordance of patient and physician race.
- 33 *Ann Intern Med*. 2003;139(11):907-915.
- 34 47. Johnson RL, Roter D, Powe NR, Cooper LA. Patient race/ethnicity and quality of patient-
- 35 physician communication during medical visits. *Am J Public Health*. 2004;94(12):2084-
- 36 2090.
- 37 48. Street RL, Jr., Gordon H, Haidet P. Physicians' communication and perceptions of
- 38 patients: is it how they look, how they talk, or is it just the doctor? *Soc Sci Med*.
- 39 2007;65(3):586-598.
- 40 49. Elliott AM, Alexander SC, Mescher CA, Mohan D, Barnato AE. Differences in
- 41 Physicians' Verbal and Nonverbal Communication With Black and White Patients at the
- 42 End of Life. *J Pain Symptom Manage*. 2016;51(1):1-8.
- 43 50. Penner LA, Gaertner S, Dovidio JF, et al. A social psychological approach to improving
- 44 the outcomes of racially discordant medical interactions. *J Gen Intern Med*.
- 45 2013;28(9):1143-1149.
- 46 51. Penner LA, Dovidio JF, Gonzalez R, et al. The Effects of Oncologist Implicit Racial Bias
- 47 in Racially Discordant Oncology Interactions. *J Clin Oncol*. 2016;34(24):2874-2880.
- 48
- 49
- 50
- 51
- 52
- 53
- 54
- 55
- 56
- 57
- 58
- 59
- 60



- 1
- 2
- 3 52. Penner L. The influence of race-related attitudes on healthcare: The Elephant in the
- 4 (Examination) room? . Division 9 Invited Address, Annual Meeting of the American
- 5 Psychological Association.; 2013; Honolulu, Hawaii.
- 6
- 7 53. Penner LA, Harper FW, Albrecht TL, Eggly S. The impact of Black patients' race-related
- 8 attitudes on the quality of racially discordant oncology interactions. Annual Meeting of
- 9 the Society of Behavioral Medicine; March, 2017; San Diego, CA.
- 10
- 11 54. Penner LA, Blair IV, Albrecht TL, Dovidio JF. Reducing Racial Health Care Disparities:
- 12 A Social Psychological Analysis. *Policy Insights Behav Brain Sci.* 2014;1(1):204-212.
- 13
- 14 55. Hamel LM. Racial attitudes and nonverbal convergence of patients and physicians in
- 15 oncology interactions. Invited Presentation, University of Rochester Medical School's
- 16 Cancer Control Research Group; 2016; Rochester, NY.
- 17
- 18 56. Hamel LM, Manning MA, Eggly S, Penner LA, Chapman R, Albrecht TL. Racial
- 19 attitudes and nonverbal convergence of patients and physicians in oncology interactions.
- 20 International Conference on Communication in Healthcare; 2016, September;
- 21 Heidelberg, Germany.
- 22
- 23 57. Richeson JA, Shelton JN. Brief report: Thin slices of racial bias. *Journal of Nonverbal*
- 24 *Behavior.* 2005;29(1):75-86.
- 25
- 26 58. Dovidio JF, Kawakami K, Gaertner SL. Implicit and explicit prejudice and interracial
- 27 interaction. *Journal of Personality and Social Psychology.* 2002;82(1):62-68.
- 28
- 29 59. Dovidio JF, Kawakami K, Johnson C, Johnson B, Howard A. On the nature of prejudice:
- 30 Automatic and controlled processes. *Journal of Experimental Social Psychology.*
- 31 1997;33(5):510-540.
- 32
- 33 60. Dovidio JF, LaFrance M. Race, ethnicity, and nonverbal behavior. . In: Hall JA, Knapp
- 34 M, eds. *Nonverbal communication.* The Hague, The Netherlands: DeGruyter-Mouton;
- 35 2013:671-696.
- 36
- 37 61. Penner LA, Hagiwara N, Eggly S, Gaertner SL, Albrecht TL, Dovidio JF. Racial
- 38 Healthcare Disparities: A Social Psychological Analysis. *Eur Rev Soc Psychol.*
- 39 2013;24(1):70-122.
- 40
- 41 62. Kimura M, Daibo I. Interactional synchrony in conversations about emotional episodes:
- 42 A measurement by "the between-participants pseudosynchrony experimental paradigm".
- 43 *Journal of Nonverbal Behavior.* 2006;30(3):115-126.
- 44
- 45 63. Chartrand TL, Lakin JL. The Antecedents and Consequences of Human Behavioral
- 46 Mimicry. *Annual Review of Psychology, Vol 64.* 2013;64:285-308.
- 47
- 48 64. White K, Argo JJ. When Imitation Doesn't Flatter: The Role of Consumer Distinctiveness
- 49 in Responses to Mimicry. *Journal of Consumer Research.* 2011;38(4):667-680.
- 50
- 51 65. Chartrand TL, Maddux WW, Lakin JL. Beyond the perception-behavior link: The
- 52 ubiquitous utility and motivational moderators of nonconscious mimicry. In: Hassin RR,
- 53 Uleman JS, Bargh JA, eds. *The New Unconscious:* Oxford University Press; 2005:334-
- 54 361.
- 55
- 56 66. Vacharkulksemsuk T, Fredrickson BL. Strangers in sync: Achieving embodied rapport
- 57 through shared movements. *Journal of Experimental Social Psychology.* 2012;48(1):399-
- 58 402.
- 59
- 60 67. Hove MJ, Risen JL. It's All in the Timing: Interpersonal Synchrony Increases Affiliation.
- 61 *Social Cognition.* 2009;27(6):949-960.

- 1  
2  
3 68. Miles LK, Griffiths JL, Richardson MJ, Macrae CN. Too late to coordinate: Contextual  
4 influences on behavioral synchrony. *European Journal of Social Psychology*.  
5 2010;40(1):52-60.  
6  
7 69. Miles LK, Lumsden J, Richardson MJ, Macrae CN. Do birds of a feather move together?  
8 Group membership and behavioral synchrony. *Experimental Brain Research*.  
9 2011;211(3-4):495-503.  
10  
11 70. Sacheli LM, Christensen A, Giese MA, et al. Prejudiced interactions: implicit racial bias  
12 reduces predictive simulation during joint action with an out-group avatar. *Scientific*  
13 *Reports*. 2015;5.  
14  
15 71. Paladino MP, Mazzurega M, Pavani F, Schubert TW. Synchronous Multisensory  
16 Stimulation Blurs Self-Other Boundaries. *Psychological Science*. 2010;21(9):1202-1207.  
17  
18 72. Wiltermuth S. Synchrony and destructive obedience. *Social Influence*. 2012;7(2):78-89.  
19  
20 73. Ramseyer F, Tschacher W. Nonverbal Synchrony in Psychotherapy: Coordinated Body  
21 Movement Reflects Relationship Quality and Outcome. *Journal of Consulting and*  
22 *Clinical Psychology*. 2011;79(3):284-295.  
23  
24 74. Valdesolo P, Ouyang J, DeSteno D. The rhythm of joint action: Synchrony promotes  
25 cooperative ability. *Journal of Experimental Social Psychology*. 2010;46(4):693-695.  
26  
27 75. Macrae CN, Duffy OK, Miles LK, Lawrence J. A case of hand waving: Action synchrony  
28 and person perception. *Cognition*. 2008;109(1):152-156.  
29  
30 76. Miles LK, Nind LK, Henderson Z, Macrae CN. Moving memories: Behavioral synchrony  
31 and memory for self and others. *Journal of Experimental Social Psychology*.  
32 2010;46(2):457-460.  
33  
34 77. Albrecht TL, Eggly SS, Gleason ME, et al. Influence of clinical communication on  
35 patients' decision making on participation in clinical trials. *J Clin Oncol*.  
36 2008;26(16):2666-2673.  
37  
38 78. Eggly S, Hamel LM, Foster TS, et al. Randomized trial of a question prompt list to  
39 increase patient active participation during interactions with black patients and their  
40 oncologists. *Patient Educ Couns*. 2017;100(5):818-826.  
41  
42 79. Penner LA, Orom H, Albrecht TL, Franks MM, Foster TS, Ruckdeschel JC. Camera-  
43 related behaviors during video recorded medical interactions. *Journal of Nonverbal*  
44 *Behavior*. 2007;31(2):99-117.  
45  
46 80. Riddle DL, Albrecht TL, Coovert MD, et al. Differences in audiotaped versus videotaped  
47 physician-patient interactions. *Journal of Nonverbal Behavior*. 2002;26(4):219-239.  
48  
49 81. Dugan E, Trachtenberg F, Hall MA. Development of abbreviated measures to assess  
50 patient trust in a physician, a health insurer, and the medical profession. *BMC Health*  
51 *Serv Res*. 2005;5:64.  
52  
53 82. Greenwald AG, Nosek BA, Banaji MR. Understanding and using the implicit association  
54 test: I. An improved scoring algorithm. *J Pers Soc Psychol*. 2003;85(2):197-216.  
55  
56 83. Ambady N, Rosenthal R. Thin Slices of Expressive Behavior as Predictors of  
57 Interpersonal Consequences - a Metaanalysis. *Psychological Bulletin*. 1992;111(2):256-  
58 274.  
59  
60 84. Murphy NA. Using thin slices for behavioral coding. *Journal of Nonverbal Behavior*.  
2005;29(4):235-246.  
85. Roter DL, Hall JA, Blanch-Hartigan D, Larson S, Frankel RM. Slicing it thin: New  
methods for brief sampling analysis using RIAS-coded medical dialogue. *Patient*  
*Education and Counseling*. 2011;82(3):410-419.

- 1  
2  
3 86. Roter DL, Hall JA, Aoki Y. Physician gender effects in medical communication: a meta-  
4 analytic review. *JAMA*. 2002;288(6):756-764.  
5 87. Janssen SM, Lagro-Janssen AL. Physician's gender, communication style, patient  
6 preferences and patient satisfaction in gynecology and obstetrics: a systematic review.  
7 *Patient Educ Couns*. 2012;89(2):221-226.  
8 88. Schieber AC, Delpierre C, Lepage B, et al. Do gender differences affect the doctor-  
9 patient interaction during consultations in general practice? Results from the  
10 INTERMEDE study. *Fam Pract*. 2014;31(6):706-713.  
11 89. Inglehart MR. Interactions between patients and dental care providers: does gender  
12 matter? *Dent Clin North Am*. 2013;57(2):357-370.  
13 90. Bertakis KD, Azari R. Patient-centered care: the influence of patient and resident  
14 physician gender and gender concordance in primary care. *J Womens Health (Larchmt)*.  
15 2012;21(3):326-333.  
16 91. Iacus SM KG, Porro G. . Causal inference without balance checking: Coarsened exact  
17 matching. *Political Analysis* 2011;mpr013.  
18 92. King GN, R. . Why propensity scores should not be used for matching. *Working Paper*.  
19 2016.  
20 93. Austin PC. An Introduction to Propensity Score Methods for Reducing the Effects of  
21 Confounding in Observational Studies. *Multivariate Behav Res*. 2011;46(3):399-424.  
22 94. *Motion Energy Analysis (MEA) [Computer software]*. [computer program]. Retrieved  
23 from <http://www.psync.ch2016>.  
24 95. Ramseyer F, Tschacher W. Nonverbal Synchrony or Random Coincidence? How to Tell  
25 the Difference. *Development of Multimodal Interfaces: Active Listening and Synchrony*.  
26 2010;5967:182-196.  
27 96. Ramseyer F, Tschacher W. Nonverbal synchrony in psychotherapy: Coordinated  
28 movement, the therapeutic relationship and outcome. *International Journal of*  
29 *Psychology*. 2008;43(3-4):59-59.  
30 97. Boker SM, Xu MQ, Rotondo JL, King K. Windowed cross-correlation and peak picking  
31 for the analysis of variability in the association between behavioral time series.  
32 *Psychological Methods*. 2002;7(3):338-355.  
33 98. Preacher KJ, Zyphur MJ, Zhang Z. A General Multilevel SEM Framework for Assessing  
34 Multilevel Mediation. *Psychological Methods*. 2010;15(3):209-233.  
35 99. Preacher KJ, Zhang Z, Zyphur MJ. Alternative Methods for Assessing Mediation in  
36 Multilevel Data: The Advantages of Multilevel SEM. *Structural Equation Modeling-a*  
37 *Multidisciplinary Journal*. 2011;18(2):161-182.  
38  
39  
40  
41  
42  
43  
44

#### 45 **Authors' Statement:**

46 LMH: Principal Investigator, involved in all aspects of conceptualization and study design.  
47

48 RM: Research Assistant, involved in the study design and responsible for design and  
49 implementation of statistical analyses.  
50

51 TLA: Co-Investigator, involved in all aspects of conceptualization and study design.  
52  
53  
54  
55  
56  
57  
58  
59



1  
2  
3 SB: Co-Investigator, involved in all aspects of conceptualization and study design and  
4 responsible for design and implementation of statistical analyses.  
5

6 SE: Co-Investigator, involved in all aspects of conceptualization and study design.  
7

8  
9 LAP: Co-Investigator, involved in all aspects of conceptualization and study design.  
10

11  
12 **Funding:** This work was supported by the National Institutes of Health/National Institute on  
13 Minority Health and Health Disparities 1R21MD011766-01A1 (L. Hamel, PI)  
14

15  
16 **Competing interests statement:** The authors have no competing interests to disclose.  
17  
18  
19  
20  
21  
22  
23  
24  
25  
26  
27  
28  
29  
30  
31  
32  
33  
34  
35  
36  
37  
38  
39  
40  
41  
42  
43  
44  
45  
46  
47  
48  
49  
50  
51  
52  
53  
54  
55  
56  
57  
58  
59  
60

Figures

Figure 1: Conceptual Model

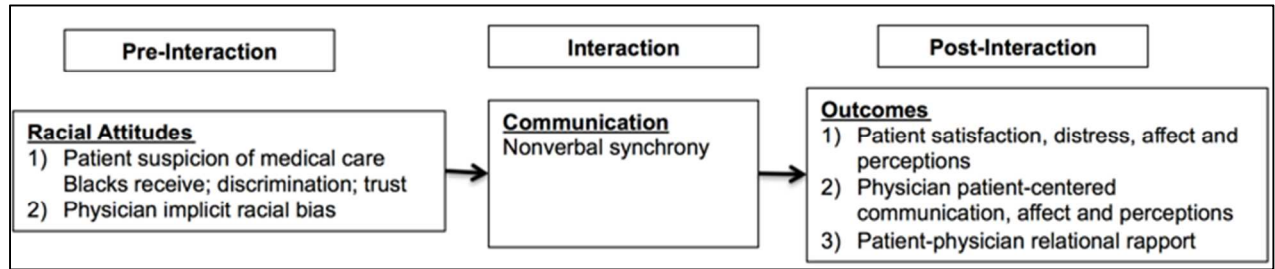

Figure 2: Motion Energy Analysis Software

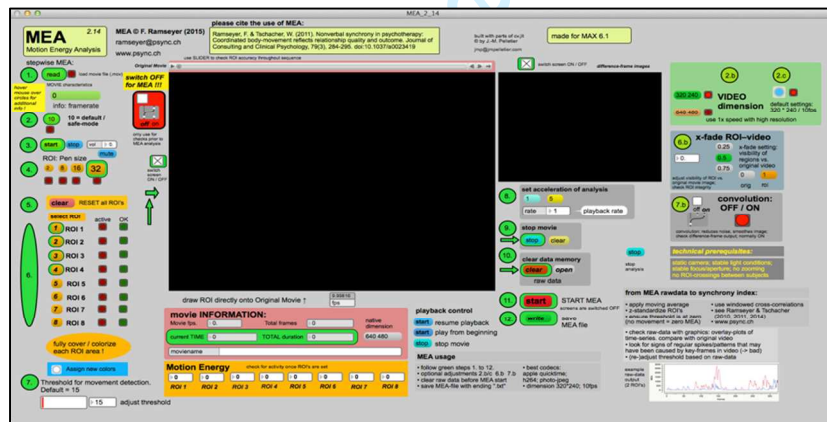

Figure 3: Window Cross Correlation Output

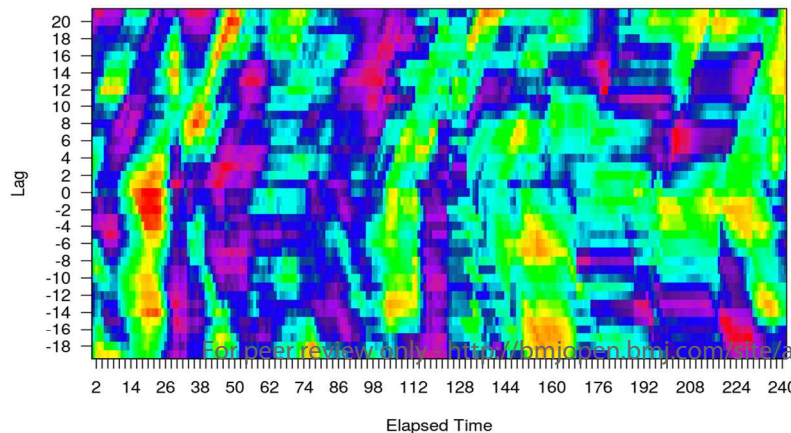

# BMJ Open

**Nonverbal synchrony as a behavioral marker of patient and physician race-related attitudes and a predictor of outcomes in oncology interactions: Protocol for a secondary analysis of video-recorded cancer treatment discussions**

|                                 |                                                                                                                                                                                                                                                                                                                                                                                                                      |
|---------------------------------|----------------------------------------------------------------------------------------------------------------------------------------------------------------------------------------------------------------------------------------------------------------------------------------------------------------------------------------------------------------------------------------------------------------------|
| Journal:                        | <i>BMJ Open</i>                                                                                                                                                                                                                                                                                                                                                                                                      |
| Manuscript ID                   | bmjopen-2018-023648.R1                                                                                                                                                                                                                                                                                                                                                                                               |
| Article Type:                   | Protocol                                                                                                                                                                                                                                                                                                                                                                                                             |
| Date Submitted by the Author:   | 12-Sep-2018                                                                                                                                                                                                                                                                                                                                                                                                          |
| Complete List of Authors:       | Hamel, Lauren; Wayne State University/Karmanos Cancer Institute, Oncology<br>Moulder, Robert; University of Virginia, Psychology<br>Albrecht, Terrance; Wayne State University/Karmanos Cancer Institute, Oncology<br>Boker, Steven; University of Virginia, Psychology<br>Eggle, Susan; Wayne State University, Department of Oncology<br>Penner, Louis; Wayne State University/Karmanos Cancer Institute, Oncology |
| <b>Primary Subject Heading</b>: | Communication                                                                                                                                                                                                                                                                                                                                                                                                        |
| Secondary Subject Heading:      | Oncology                                                                                                                                                                                                                                                                                                                                                                                                             |
| Keywords:                       | Disparities, Cancer, Racial discordance, Nonverbal synchrony, Race-related attitudes                                                                                                                                                                                                                                                                                                                                 |
|                                 |                                                                                                                                                                                                                                                                                                                                                                                                                      |

SCHOLARONE™  
Manuscripts

1  
2  
3 **Nonverbal synchrony as a behavioral marker of patient and physician race-related**  
4 **attitudes and a predictor of outcomes in oncology interactions:**  
5 **Protocol for a secondary analysis of video-recorded cancer treatment discussions**  
6

7  
8 Lauren M. Hamel, PhD

9 Corresponding Author

10 Department of Oncology, School of Medicine  
11 Wayne State University/Karmanos Cancer Institute  
12 4100 John R. Mailcode: MM03CB  
13 Detroit, MI 48201  
14 313-576-9672  
15 hamell@karmanos.org

16  
17  
18 Robert Moulder, BS

19 Department of Psychology, University of Virginia  
20 P.O. Box 400400 Department of Psychology  
21 Charlottesville, VA 22903  
22 [rgm4fd@virginia.edu](mailto:rgm4fd@virginia.edu)

23  
24  
25 Terrance L. Albrecht, PhD

26 Department of Oncology, School of Medicine  
27 Wayne State University/Karmanos Cancer Institute  
28 4100 John R. Mailcode: MM03CB  
29 Detroit, MI 48201  
30 313-576-8262  
31 albrecht@karmanos.org

32  
33  
34 Steven Boker, PhD

35 Department of Psychology, University of Virginia  
36 Gilmer Hall Room 102  
37 Charlottesville, VA 22903  
38 434-218-1248  
39 smb3u@virginia.edu

40  
41  
42 Susan Eggly, PhD

43 Department of Oncology, School of Medicine  
44 Wayne State University/Karmanos Cancer Institute  
45 4100 John R. Mailcode: MM03CB  
46 Detroit, MI 48201  
47 313-576-8260  
48 [egglys@karmanos.org](mailto:egglys@karmanos.org)  
49  
50  
51  
52  
53  
54  
55  
56  
57  
58  
59  
60

1  
2  
3 Louis A. Penner, PhD  
4 Department of Oncology, School of Medicine  
5 Wayne State University/Karmanos Cancer Institute  
6 4100 John R. Mailcode: MM03CB  
7 Detroit, MI 48201  
8 313-576-8261  
9 [pennerl@karmanos.org](mailto:pennerl@karmanos.org)  
10  
11

12 Word count: 4,118  
13  
14  
15  
16  
17  
18  
19  
20  
21  
22  
23  
24  
25  
26  
27  
28  
29  
30  
31  
32  
33  
34  
35  
36  
37  
38  
39  
40  
41  
42  
43  
44  
45  
46  
47  
48  
49  
50  
51  
52  
53  
54  
55  
56  
57  
58  
59  
60

For peer review only

## Abstract

**Introduction:** Racial disparities in cancer treatment contribute to racial disparities in mortality rates. The quality of patient-physician communication during clinical interactions with Black patients and non-Black physicians (racially discordant) is poorer than communication quality in with White patients (racially concordant). Patient and physician race-related attitudes affect the quality of this communication. These attitudes are likely expressed through subtle nonverbal behaviors, but prior research has not examined these behaviors. Nonverbal synchrony, the coordination of physical movement, reflects the pre-interaction attitudes of participants in interactions *and* predicts their post-interaction perceptions of and affect toward one another. In this study, peer reviewed and funded by the National Institute of Minority Health and Health Disparities (R21MD011766), we will investigate nonverbal synchrony in racially concordant and discordant interactions to better understand racial disparities in clinical communication.

**Methods and analysis:** This secondary analysis includes racially concordant (n=163) and racially discordant (n=68) video-recorded oncology interactions, patient and oncologist self-reported race-related attitudes, perceptions of the interaction; and observer ratings of physician patient-centered communication and patient and physician affect and rapport. In Aim 1, we will assess and compare nonverbal synchrony between physicians and patients in racially concordant and discordant interactions. In Aim 2, we will determine the influence of nonverbal synchrony on patient and physician affect and communication. In Aim 3, we will examine possible causes (i.e., race-related attitudes) and consequences (i.e., negative perceptions) of nonverbal synchrony in racially discordant interactions. In Aim 4, we will develop and test a mediational model linking physician and patient race-related attitudes to nonverbal synchrony and, in turn, interaction outcomes.

**Ethics and dissemination:** The parent and current studies are IRB-approved. Since only archival data will be used, ethical or safety risks are low. We will disseminate our findings to communication, psychology, and oncology conferences and journals.

**Key Word: Nonverbal Synchrony; Disparities; Cancer; Racial Discordance; Race-related Attitudes**

**Strengths and limitations of this study:**

- This study explores nonverbal synchrony, a channel of communication that has not been previously examined in medical interactions.
- This study utilizes video-recorded cancer treatment discussions of Black and White patients with cancer, recorded with state-of-art recording equipment.
- This study utilizes automated behavioral coding software, which introduces less error than traditional methods using human coders.
- This study takes advantage of existing datasets, but the video-recorded and self-report data were not collected with the current hypotheses in mind.
- The data are not evenly distributed by sex and race.

## INTRODUCTION

Racial disparities in cancer mortality and treatment are well documented. In the United States, deaths due to cancer are approximately 20% higher for Black patients than for White patients.<sup>1</sup> This mortality disparity remains even after controlling for stage at diagnosis, disease aggressiveness, obesity, comorbidities, physician access, insurance status, and referrals.<sup>2-6</sup> Importantly, this disparity is greatest for the most treatable cancers.<sup>7</sup> This strongly suggests treatment disparities may contribute to mortality disparities.<sup>8-14</sup> For example, Black patients with cancer are less likely to receive chemotherapy for leukemia, breast, lung, and colorectal cancers. If they do receive treatment, it is more likely to be delayed or not adherent to the treatment guidelines set by the National Comprehensive Cancer Network.<sup>2,8,15-23</sup> Multiple causes of these treatment disparities exist including tumor biology, socioeconomic status, environment, and access to care.<sup>6</sup> However, research clearly shows that even when these factors are controlled, racial disparities in treatment remain. We focus on two other contributors to racial disparities in cancer treatments: 1) poor patient-physician communication during oncology interactions,<sup>24-30</sup> and 2) race-related attitudes and perceptions of physicians and patients.<sup>31-42</sup>

Black patients experience poorer quality communication during oncology interactions compared to similar interactions with White patients. Due to the small number of Black physicians, especially Black oncologists,<sup>43</sup> about 80% of Black patients' clinical interactions are racially discordant (Black patients, non-Black physicians).<sup>44</sup> Patient-physician communication is often of poorer quality in racially discordant clinical interactions than racially concordant ones. Patients in racially discordant interactions tend to ask fewer questions<sup>25</sup> and are less likely to participate in decision making,<sup>45</sup> whereas physicians tend to be less patient-centered,<sup>46,47</sup> more verbally dominant,<sup>47</sup> more contentious,<sup>48</sup> exhibit fewer rapport building nonverbal behaviors,<sup>49</sup>



1  
2  
3 and provide less information.<sup>27</sup> Physicians and patients show fewer expressions of positive  
4 affect<sup>47</sup> and relationship-building attempts.<sup>29</sup>  
5  
6

7  
8 Patient and physician race-related attitudes and perceptions affect interaction outcomes via  
9 communication behaviors. Prior research, including our own, suggests that *race-related attitudes*  
10 *and perceptions* (e.g., physician implicit bias against Black people, patient suspicion of medical  
11 care Black people receive) affect communication in clinical interactions and perceptions  
12 physicians and patients have of each other during racially discordant clinical interactions.<sup>31-33,37,38</sup>  
13  
14 For example, physicians with higher levels of implicit (nonconscious) bias against Black people  
15 are perceived as less patient-centered and less trustworthy by their Black patients than physicians  
16 with lower levels of implicit bias against Black people.<sup>31,40,41,50</sup> Our prior research suggests such  
17 perceptions and behaviors are associated with less positive patient expectations about  
18 recommended treatments.<sup>51</sup> We have also found that Black patients with higher levels of  
19 suspicion of medical care are less optimistic about outcomes of recommended treatments and are  
20 perceived by their physicians to be less educated.<sup>52</sup> This, in turn, is associated with less positive  
21 physician expectations about how their Black patients will do on a treatment protocol, such as  
22 their adherence and/or ability to tolerate treatment. Given that these attitudes and perceptions are  
23 not directly observable, the only possible way in which they can affect perceptions and  
24 expectations is through their influence on communication behaviors.  
25  
26  
27  
28  
29  
30  
31  
32  
33  
34  
35  
36  
37  
38  
39  
40  
41  
42  
43

44  
45 Relatively little is known about *how* race-related attitudes and perceptions are manifested in  
46 communication behaviors during oncology interactions, or the effects of communication on  
47 interaction outcomes. Our own and others' research has shown that non-Black physicians'  
48 nonconscious race-related attitudes (i.e., implicit racial bias) influence their communication with  
49 Black patients.<sup>51,53,54</sup> Studies of nonmedical interracial interactions find that implicit bias is more  
50  
51  
52  
53  
54  
55  
56  
57  
58  
59  
60

1  
2  
3 likely to be expressed through less deliberate nonverbal communication (e.g., facial expressions,  
4 posture) than through more deliberate verbal communication (e.g., spoken words).<sup>55-58</sup> Black  
5 patients' communication may be driven more by explicit than implicit race-related attitudes and  
6 perceptions,<sup>59</sup> but its expression may also be subtle and involve less deliberate communication  
7 (e.g., nonverbal behaviors).<sup>54</sup> The behavioral channels through which these race-related attitudes  
8 and perceptions are expressed are not known, but nonverbal synchrony is a promising candidate  
9 as one of them.

10  
11  
12  
13  
14  
15  
16  
17  
18  
19 Nonverbal synchrony is the coordination of physical movement that occurs between two  
20 individuals during an interaction.<sup>60</sup> The construct of synchrony was first introduced more than 50  
21 years ago and has sparked many related areas of study.<sup>61</sup> Here, we consider nonverbal synchrony  
22 as a dynamic and jointly determined phenomenon, not focused on any particular behavior (e.g.,  
23 posture, eye contact). Rather, we consider nonverbal synchrony as a form of behavioral matching  
24 between two individuals. This matching does not have to occur at the same time (as it would for  
25 two people dancing), but it must involve similar kinds of motion and exhibit some sort of  
26 coordinated back-and-forth between individuals.<sup>62-64</sup> As an example, an individual shaking his or  
27 her head while another individual waves his or her hand would exhibit nonverbal synchrony but  
28 they are not mirroring one another nor are they perfectly in time.<sup>63</sup>

29  
30  
31  
32  
33  
34  
35  
36  
37  
38  
39  
40  
41  
42 Considerable prior laboratory-based research shows that nonverbal synchrony is often  
43 nonconscious, unintentional, and effortless.<sup>65-67</sup> However, nonverbal synchrony can be predicted  
44 by pre-interaction attitudes<sup>68</sup> and has post-interaction consequences.<sup>69</sup> People synchronize more  
45 with others with whom they have positive relationships,<sup>70</sup> those with whom they want to develop  
46 positive relationships,<sup>71</sup> and others whom they trust.<sup>68</sup> In a recent experimental laboratory-based  
47 study, individuals with higher implicit bias favoring their own race synchronized more with an  
48  
49  
50  
51  
52  
53  
54  
55  
56  
57  
58  
59  
60

1  
2  
3 avatar of their own race than with an avatar of a different race.<sup>72</sup> In terms of nonverbal  
4 synchrony's role as a predictor, nonverbal synchrony reflects more subsequent positive affect  
5 and liking,<sup>69</sup> perceptions of similarity, closeness, rapport with the interaction partner, and  
6 collaborative problem solving.<sup>68,73-75</sup> More relevant to clinical communication, nonverbal  
7 synchrony has been found to positively influence therapeutic processes,<sup>76</sup> cooperation,<sup>77</sup>  
8 obedience,<sup>74</sup> and memory for information provided by the interaction partner.<sup>78,79</sup>  
9

10  
11 To summarize, current evidence indicates that Black patients and non-Black physicians  
12 have negative reactions to each other's race-related attitudes and perceptions. Also, evidence  
13 indicates that these attitudes and perceptions are subtly manifested in communication. Little is  
14 known, however, about the channels through which these attitudes and perceptions are  
15 communicated. Because nonverbal synchrony is subtle, unintentional, automatic, and affect-  
16 laden, it may likely serve as a behavioral marker of race-related attitudes and perceptions. Here  
17 we describe the protocol for a study that will help fill this gap in understanding by examining the  
18 role of nonverbal synchrony in racially concordant and racially discordant oncology interactions.  
19 The study was designed to achieve the following *aims* and *hypotheses*, which are based on the  
20 research reviewed:  
21  
22  
23  
24  
25  
26  
27  
28  
29  
30  
31  
32  
33  
34  
35  
36  
37  
38  
39

40 Aim 1: Assess and compare nonverbal synchrony between physicians and patients in  
41 racially concordant and racially discordant oncology interactions.  
42  
43

44 Hypothesis 1: Nonverbal synchrony will be greater in racially concordant than in  
45 racially discordant oncology interactions.  
46  
47  
48

49 Aim 2: Determine the influence of nonverbal synchrony on physician communication  
50 style (e.g., level of patient-centeredness) and patient and physician affect in racially  
51 concordant and racially discordant oncology interactions.  
52  
53  
54  
55  
56  
57  
58  
59  
60

1  
2  
3 Hypothesis 2: Nonverbal synchrony will positively influence physician patient-  
4 centered communication, patient and physician affect, and relational rapport in  
5  
6 racially concordant and racially discordant clinical interactions.  
7  
8  
9

10 Aim 3: Examine the antecedents and outcomes of nonverbal synchrony in racially  
11  
12 discordant oncology interactions.  
13

14 Hypothesis 3: In racially discordant oncology interactions, nonverbal synchrony  
15 will significantly negatively covary with patient post-interaction distress and  
16  
17 positively covary with 1) patient post-interaction perceptions of physicians'  
18  
19 patient-centered communication and treatment expectations; 2) physicians' post-  
20  
21 interaction perceptions of patient personal characteristics (e.g., understanding of  
22  
23 treatment options) and their responses to treatment (e.g., willingness to follow  
24  
25 treatment regimen), and 3) observers' ratings of physician patient-centered  
26  
27 communication, patient and physician affect, and relational rapport.  
28  
29  
30  
31  
32

33 Hypothesis 4: Nonverbal synchrony will significantly covary with pre-interaction  
34  
35 race-related attitudes and perceptions of the patient and physicians (e.g. physician  
36  
37 implicit bias; patient suspicion).  
38  
39

40 Aim 4: Develop and test a mediational model that links physician and patient race-related  
41  
42 attitudes and perceptions to nonverbal synchrony and, in turn, outcomes of racially  
43  
44 discordant oncology interactions.  
45

46 Hypothesis 5: Nonverbal synchrony will mediate the relationship between pre-  
47  
48 interaction race-related attitudes and perceptions and post-interaction perceptions  
49  
50 of the patients and physicians.  
51  
52  
53  
54  
55  
56  
57  
58  
59  
60

## METHODS AND ANALYSIS

**Overview of proposed study.** Our goals are to: 1) compare the extent to which physicians and patients synchronize their behavior in racially concordant and racially discordant oncology interactions; 2) compare the associations between nonverbal synchrony and self-report and observational measures of patient and physician affect and physicians' patient-centered communication in racially concordant and racially discordant oncology interactions; 3) investigate how race-related attitudes and perceptions (e.g., physician implicit bias, patient suspicion) affect nonverbal synchrony in racially discordant oncology interactions; 4) investigate how nonverbal synchrony affects the outcomes of racially discordant clinical interactions; and 5) test the conceptual model in Figure 1, which predicts that race-related attitudes and perceptions will be associated with patient and physician perceptions and treatment-related outcomes of racially discordant oncology interactions, through their influence on nonverbal synchrony. To achieve these goals, we will conduct a secondary analysis of data from two studies conducted by members of our study team. This secondary analysis was officially funded in September 2017. Thus, it is ongoing and will be completed by August 2019. **Study One**, which was funded by the National Cancer Institute (NCI), was conducted at two NCI-designated comprehensive cancer centers between April 2002 and March 2006 (R01CA75003),<sup>80</sup> was an investigation of how patient-oncologist communication influences patients' decision making about treatment including clinical trials. **Study Two** (also funded by the NCI), was conducted at one of the **Study One** NCI-designated centers plus another large urban cancer clinic in the same city between April 2012 and December 2014. **Study Two** investigated associations between communication and outcomes during racially discordant oncology interactions (U54CA153606-04).<sup>81</sup> Only patients and oncologists from these studies who agreed on their consent forms to allow their

1  
2  
3 video-recorded and self-reported data to be used in secondary analyses will be used in the current  
4 study. Comparisons of groups did not find any socio-demographic or attitudinal differences  
5 between patients/oncologists who did and did not agree to be in secondary analyses.  
6  
7  
8  
9

### 10 **Data Sources.**

11  
12 *Participants, Procedures, and Measures in Study One.* Patients from **Study One** who are in the  
13 current study include 163 self-identified White (92 male; 71 female) patients who were meeting  
14 with a White medical oncologist for the first time to discuss treatment for their cancer. Upon  
15 consent, which occurred immediately prior to meeting their oncologist, patients completed a  
16 survey assessing their sociodemographic characteristics. Oncologists were 22 White male  
17 medical oncologists (no female oncologists participated in **Study One**) who saw at least one  
18 participating patient ( $M = 7.4$   $SD = 7.0$ ). Upon consent, oncologists completed a demographic  
19 survey. Exam rooms were equipped with unobtrusive digital audio and video recording devices.  
20 Studies have demonstrated the nonreactance to the recording process,<sup>82</sup> and enhanced validity  
21 compared to audio recording alone.<sup>83</sup>  
22  
23  
24  
25  
26  
27  
28  
29  
30  
31  
32  
33  
34

35 *Participants, Procedures, and Measures in Study Two.* Patients from **Study Two** who are in the  
36 current study include 68 Black female patients who were meeting with a non-Black medical  
37 oncologist for the time to discuss treatment for their cancer. While patients were recruited for  
38 **Study Two** irrespective of sex, only 6 of the patients who enrolled were males. A meaningful  
39 statistical comparison on the variables of interest by patient sex cannot be conducted with so few  
40 male participants. Thus, we are excluding them from further analyses. Upon consent, patients  
41 provided sociodemographic information and completed measures of suspicion of medical care  
42 Black patients receive<sup>34</sup> and trust in medical institutions.<sup>84</sup> Oncologists were 16 (7 females; 9  
43 males; 8 White; 6 Asian/Pacific Islander; 2 Arab/Middle Eastern) medical oncologists who saw  
44  
45  
46  
47  
48  
49  
50  
51  
52  
53  
54  
55  
56  
57  
58  
59  
60

1  
2  
3 at least one participating patient ( $M = 5.2$ ,  $SD = 6.4$ ). Upon consent, oncologists completed a  
4 demographic survey and the Implicit Association Test, which assesses implicit racial bias against  
5 Black people.<sup>85</sup> Just as in **Study One**, exam rooms in **Study Two** were equipped with  
6 unobtrusive digital audio and video recording devices.  
7  
8  
9  
10

11  
12 In **Study Two**, oncologists were consented upon enrollment, and the video-recorded  
13 clinical interactions took place within two weeks after patients consented. Immediately after the  
14 interactions, patients completed measures of distress,<sup>86</sup> perception of the physicians' patient-  
15 centered communication,<sup>87</sup> and expectations about recommended treatment. Also, immediately  
16 after interactions, oncologists completed measures of perceptions of the patient and how well the  
17 patient would do in treatment. One week later, patients reported their level of trust in their  
18 oncologist<sup>84</sup> in a telephone survey. Trained observers later observed and rated video-recorded  
19 interactions to assess physicians' patient-centered communication.<sup>48</sup> To do this, coders applied a  
20 global scale of physicians' patient-centered communication which assessed physicians'  
21 informativeness (e.g., "the doctor thoroughly explained everything to the patient");  
22 supportiveness (e.g., "the doctor made the patient feel completely at ease during the  
23 consultation"); and partnership building (e.g., "the doctor encouraged the patient to express  
24 concerns and worries").<sup>48</sup> At least two observers rated physicians' patient-centered  
25 communication (three observers rated 15% of interactions to ensure continued reliability); inter-  
26 rater reliability was acceptable (intra-class correlation coefficient = .57-.74,  $p$ 's<.05). Each  
27 physician's patient-centered communication score was the average of observer ratings.  
28  
29  
30  
31  
32  
33  
34  
35  
36  
37  
38  
39  
40  
41  
42  
43  
44  
45  
46  
47  
48

49 Five one-minute video slices were created from each of the recordings from the two  
50 studies ( $N = 340$  slices) by dividing each video recording into five equal segments and selecting  
51 the first minute from each segment.<sup>55,88-90</sup> The slices were observed and rated by naïve observers  
52  
53  
54  
55  
56  
57  
58  
59  
60

1  
2  
3 who had no training other than instructions to provide their ratings for patient and physician  
4 affect (e.g. warm/friendly) and relational rapport (e.g. attentive). The use of naïve observers is  
5  
6 consistent with this type of methodology.<sup>55,88</sup>  
7  
8  
9

## 10 **Hypotheses and Data Analysis.**

11  
12 **Aim 1: Assess and compare nonverbal synchrony between physicians and patients in**  
13 **racially concordant and racially discordant oncology interactions.** We will achieve this aim  
14  
15 by first matching video recordings from **Study One** and **Study Two** on patient and physician sex  
16  
17 and other sociodemographics. Although our focus is on racial concordance/discordance, prior  
18  
19 research suggests that patient and physician sex affects communication in medical interactions.<sup>91-</sup>  
20  
21  
22  
23  
24 <sup>95</sup> However, as described above, matching on sex is constrained by the distributions in the  
25  
26 original recordings. Thus, from **Study One**, we will use 71 White female patients and 92 White  
27  
28 male patients who interacted with White male physicians. From **Study Two**, we will use the 34  
29  
30 Black female patient/non-Black male physician dyads and 34 Black female patient/non-Black  
31  
32 female physician dyads. Thus, within race concordant and race discordant interactions we will  
33  
34 examine the effects of sex concordance and discordance. We acknowledge that this is not a full  
35  
36 factorial design, but it will permit us to examine the influence of race concordance/discordance  
37  
38 on nonverbal synchrony and, also partially examine whether the influence of race on nonverbal  
39  
40 synchrony is moderated by patient and physician sex. To minimize any other differences  
41  
42 between Black patients and White patients, we will also do block matching of patients from  
43  
44 **Study One** with patients from **Study Two** on characteristics that might affect nonverbal  
45  
46 communication (e.g., age, type of cancer). We expect this matching will reduce the number of  
47  
48 patients available from **Study One** by 20-30% percent, but sufficient cases will be available for  
49  
50  
51  
52  
53  
54  
55  
56  
57  
58  
59  
60



1  
2  
3 well-powered analyses of racial concordance/discordance. We will then further the equivalence  
4 of patients with advanced methods of propensity scoring.<sup>96-98</sup>  
5  
6

7  
8 We will assess nonverbal synchrony in all matched interactions using customized Motion  
9 Energy Analysis (<http://psync.ch/?p=9>)<sup>76,99</sup> software to obtain synchrony scores for each  
10 interaction. Figure 2 is a screenshot of the Motion Energy Analysis software. Motion Energy  
11 Analysis is an objective automated method that continuously monitors the amount of movement  
12 occurring in pre-defined regions of interest.<sup>62,76,100</sup> Motion Energy Analysis captures frame-by-  
13 frame movement and provides quantification of change in movement in the “regions of interest”.  
14 In this study, we consider each individual as one “region of interest,” allowing us to capture full  
15 body movement. Motion Energy Analysis uses pixel-differencing methods to measure total  
16 amount of movement. We will quantify nonverbal synchrony by deriving scores using windowed  
17 cross-correlation matrices to obtain synchrony scores for each interaction.<sup>101</sup> Nonverbal  
18 synchrony tends to ebb and flow during conversations.<sup>91</sup> Windowed cross-correlation accounts  
19 for the possibility of changing synchronization by comparing small sections of time at different  
20 time lags. By looking at multiple smaller sections at multiple different lags, windowed cross-  
21 correlation is able to estimate synchronization between systems which do not have a constant  
22 lag. Figure 3 is windowed cross-correlation output displayed as a heat map with warmer colors  
23 representing strong positive correlations between the two individuals’ behavior (e.g., positive  
24 nonverbal synchrony) and cooler colors representing strong negative correlations (e.g., negative  
25 nonverbal synchrony). These synchrony scores are dyadic attributes that represent amounts and  
26 relationships of synchronous movement within dyads. Once we have obtained these scores, we  
27 will compare (a) effects of race concordance versus discordance on nonverbal synchrony and (b)  
28 effects of sex concordance versus discordance on nonverbal synchrony, and (c) determine the  
29  
30  
31  
32  
33  
34  
35  
36  
37  
38  
39  
40  
41  
42  
43  
44  
45  
46  
47  
48  
49  
50  
51  
52  
53  
54  
55  
56  
57  
58  
59  
60

1  
2  
3 relative impact of race concordance/discordance versus sex concordance/discordance on  
4  
5 nonverbal synchrony.  
6

7  
8 *Hypothesis 1: Nonverbal synchrony will be greater in racially concordant than in racially*  
9  
10 *discordant oncology interactions.* To obtain time-varying synchrony scores, we will block each  
11  
12 interaction into five equal segments and obtain synchrony scores for each segment using Motion  
13  
14 Energy Analysis. This procedure also allows us to adjust for patients and physicians moving  
15  
16 outside of the regions of interest set at the beginning of each segment and maximizes the  
17  
18 likelihood that we capture all patient and physician movement. For example, this strategy will  
19  
20 help us capture continuous movement even if a patient or physician gets up from a seated  
21  
22 position and walks outside of the pre-determined region of interest. To model changes in  
23  
24 dynamic and overall levels of synchrony, we will use structural equation modeling (SEM)  
25  
26 methods, latent differential equations (LDE), and multi-level modeling (MLM) methods. LDE is  
27  
28 a special case of SEM that allows for estimation of parameters of a proposed underlying  
29  
30 dynamical system. LDE models contain parameters pertaining to the dynamics of a given system  
31  
32 (e.g., “eta” and “zeta” parameters of a latent harmonic oscillator model). We will use multi-  
33  
34 group SEM modeling to test for differences in these parameters between racially concordant and  
35  
36 racially discordant interactions. By using a likelihood ratio test comparing two models where 1)  
37  
38 these dynamic parameters are free to vary and 2) where these parameters are constrained to be  
39  
40 equal across models, we will be able to determine if the motion dynamics differ between racially  
41  
42 concordant and racially discordant interactions. Using a three-level HLM model with time  
43  
44 segments (level 1) nested within patient (level 2), and patient nested within physician (level 3),  
45  
46 we will model changes in nonverbal synchrony based on a categorical variable modeling either  
47  
48 racially concordant or racially discordant interactions. Assuming 168 dyads, an alpha of .05, a  
49  
50  
51  
52  
53  
54  
55  
56  
57  
58  
59  
60

1  
2  
3 correlation coefficient of .1, and a linear time effect, we have a power of .8 to detect an effect  
4  
5 size of .50.  
6

7  
8 **Aim 2: Determine the influence of nonverbal synchrony on physician communication and**  
9  
10 **patient and physician affect in racially concordant and racially discordant oncology**  
11 **interactions.** We will first collect the same observational measures for **Study One** as in **Study**  
12 **Two**, including physician patient-centered communication and patient and physician affect, and  
13  
14 rapport. Trained research assistants will rate each of the racially concordant interactions on  
15  
16 physicians' patient-centered communication.<sup>48</sup> Next, we will create thin slices of the interactions  
17  
18 from **Study One** and naïve observers will rate the slices using the same measures of physician-  
19  
20 patient affect and rapport as in **Study Two**. Then we will use the synchrony scores from Aim 1  
21  
22 to compare the relationship between nonverbal synchrony and patient-physician affect and  
23  
24 rapport in racially concordant and discordant interactions.  
25  
26  
27  
28  
29

30  
31 *Hypothesis 2: Nonverbal synchrony will influence physician patient-centered communication,*  
32  
33 *patient and physician affect, and relational rapport in racially concordant and racially*  
34  
35 *discordant clinical interactions.* We will use MLM and multi-group SEM to create a mediation  
36  
37 model where nonverbal synchrony will predict level-2 (patient) and level-3 (physician)  
38  
39 outcomes. Assuming 168 dyads, an alpha of .05, and a correlation coefficient of .1, we have  
40  
41 power of .8 to detect an effect size of .48.  
42  
43

44  
45 **Aim 3: Examine the antecedents and outcomes of nonverbal synchrony in racially**  
46  
47 **discordant oncology interactions.** We will achieve this aim using the synchrony scores from  
48  
49 the racially discordant interactions in **Study Two**. We will examine the relationships between  
50  
51 nonverbal synchrony and 1) interaction outcomes collected in the parent study including: patient  
52  
53 satisfaction, distress, perception of physicians' patient-centered communication, and treatment  
54  
55  
56  
57  
58  
59

1  
2  
3 expectations, and physician perceptions of the patient (e.g., willingness to follow treatment  
4 regimen), and 2) pre-interaction physician and patient race-related attitudes and perceptions (e.g.,  
5 implicit bias; suspicion), also collected in the parent study.  
6  
7

8  
9  
10 *Hypothesis 3: In the racially discordant oncology interactions, nonverbal synchrony will*  
11 *significantly negatively covary with patient post-interaction distress and positively covary with*  
12 *1) patient post-interaction perceptions of physicians' patient-centered communication and*  
13 *treatment expectations; 2) physicians' post-interaction perceptions of patient personal*  
14 *characteristics (e.g., understanding of treatment options) and their responses to treatment (e.g.,*  
15 *willingness to follow treatment regimen); and 3) observers' ratings of physician patient-centered*  
16 *communication, patient and physician affect, and relational rapport. Using LDE, we will model*  
17 *dynamic parameter values of the fluctuations in nonverbal synchrony over the course of each*  
18 *interaction. These values will then be used as first-level predictors in an MLM model. The*  
19 *second-level predictors for this model will be values associated with physician and patient post-*  
20 *interaction perceptions of the interaction and of each other. Assuming 68 dyads, an alpha of .05,*  
21 *and a correlation coefficient of .1, we have a power of .9 to detect an effect size of .56.*  
22  
23  
24  
25  
26  
27  
28  
29  
30  
31  
32  
33  
34  
35  
36

37 *Hypothesis 4: Nonverbal synchrony will significantly covary with pre-interaction race-related*  
38 *attitudes and perceptions of the patient and physicians (e.g. physician implicit bias, patient*  
39 *suspicion). We will create a three-level MLM. We will model synchrony assessed over five time*  
40 *segments nested within each patient and each patient nested within physician. Each patient-*  
41 *physician dyad will have its own average synchrony score.*  
42  
43  
44  
45  
46  
47  
48

49 **Aim 4: Develop and test a mediational model that links physician and patient race-related**  
50 **attitudes and perceptions to nonverbal synchrony and, in turn, outcomes of race-related**  
51 **discordant oncology interactions.**  
52  
53  
54  
55  
56  
57  
58  
59

1  
2  
3 *Hypothesis 5: Nonverbal synchrony will mediate the relationship between pre-interaction race-*  
4 *related attitudes and perceptions and post-interaction perceptions of the patients and physicians.*

5  
6  
7  
8 To examine the proposed mediations in a multilevel context, we will utilize multi-level SEM, as  
9  
10 described by Preacher and colleagues.<sup>102,103</sup> These models address potential conflated estimates  
11  
12 of mediated effects that can arise when using multi-level data. Time segments will be nested  
13  
14 within each patient and each patient will be nested within physician, with synchrony varying at  
15  
16 each time point. We will use a single mediation model to assess how physician and patient race-  
17  
18 related attitudes and perceptions influence interaction outcomes via their influence on nonverbal  
19  
20 synchrony.  
21  
22

### 23 **Patient and Public Involvement.**

24  
25  
26 Cancer survivors were heavily involved with both **Study One** and **Study Two**.  
27  
28 Investigators had extensive conversations with survivors about their experiences as patients and  
29  
30 survivors, which helped guide the research questions, measured outcomes, and design of both  
31  
32 studies.  
33  
34

35  
36 Patients were not directly involved with developing the research questions and outcomes  
37  
38 for this secondary analysis. However, this work extends naturally from the considerable previous  
39  
40 work we have done focused on understanding and improving patient-oncologist communication  
41  
42 for all patients, with special attention to patients more vulnerable to cancer treatment and  
43  
44 mortality disparities. This secondary analysis will investigate another important aspect of patient-  
45  
46 physician communication that our patient and physician partners have agreed needs research  
47  
48 attention.  
49  
50

51  
52 Recruitment to both **Study One** and **Study Two** was done by the investigators and their  
53  
54 research and clinic staff. As PI, Dr. Hamel will disseminate results from this investigation  
55  
56  
57  
58  
59  
60

1  
2  
3 through the Karmanos Cancer Institutes' Department of Community Outreach and Education,  
4 which has regularly scheduled meetings with cancer survivors, caretakers, and community  
5 stakeholders.  
6  
7  
8  
9

## 10 **ETHICS AND DISSEMINATION**

11  
12 Studies one, two, and the current study are all IRB-approved. Only patients and  
13 physicians from the previous studies who provided their consent for secondary analyses of their  
14 data were included in the current study. The nature of the data makes it unlikely we will  
15 encounter ethical or safety issues.  
16  
17  
18  
19  
20

21 We will submit our ongoing findings to relevant communication, social psychology, and  
22 oncology conferences. Similarly, we plan to submit the final manuscripts to high-impact  
23 communication, social psychology, and oncology peer-reviewed journals.  
24  
25  
26  
27

## 28 **LIMITATIONS**

29  
30 Although this secondary analysis is innovative in its focus and methods, it is not without  
31 limitations. First, this study takes advantage of existing datasets, but the video-recorded and self-  
32 report data were not collected with the current hypotheses in mind. Second, the data are not  
33 evenly distributed by sex and race. As is often the case with medical research involving actual  
34 patients, the distributions of study patient characteristics are constrained by the distributions of  
35 patient demographic and medical characteristics of the patients that are treated at the  
36 participating hospitals. This reality precludes us from fully examining all combinations of race  
37 and sex. However, there are advantages to the fact that this research is conducted in a real-world,  
38 rather than a laboratory setting; also, we are able to account for some variability in our models by  
39 treating certain factors (e.g., cancer type) as random effects. Last, although given a design that is  
40 adequately powered to make both between- and within-subject comparisons, it is still possible  
41  
42  
43  
44  
45  
46  
47  
48  
49  
50  
51  
52  
53  
54  
55  
56  
57  
58  
59  
60

1  
2  
3 we may find no significant findings regarding nonverbal synchrony. Of course, this finding  
4  
5 would be interesting in and of itself and would direct research attention to other avenues of  
6  
7 investigation.  
8  
9

## 10 11 12 **FIGURE LEGEND**

13  
14 Figure 1: Conceptual Model

15  
16  
17 Figure 2: Motion Energy Analysis Software

18  
19  
20  
21 Figure 3: Window Cross Correlation Output  
22  
23  
24  
25  
26  
27  
28  
29  
30  
31  
32  
33  
34  
35  
36  
37  
38  
39  
40  
41  
42  
43  
44  
45  
46  
47  
48  
49  
50  
51  
52  
53  
54  
55  
56  
57  
58  
59  
60

## REFERENCES

1. National Center for Health Statistics. *Health, United States, 2015: with special feature on racial and ethnic health disparities*. Hyattsville, MD, 2016.
2. Murphy CC, Harlan LC, Warren JL, et al. Race and insurance differences in the receipt of adjuvant chemotherapy among patients with stage III colon cancer. *J Clin Oncol*. 2015;33(23):2530-2536.
3. Bach PB, Schrag D, Brawley OW, et al. Survival of blacks and whites after a cancer diagnosis. *JAMA*. 2002;287(16):2106-2113.
4. Greenwald HP, Polissar NL, Borgatta EF, et al. Social factors, treatment, and survival in early-stage non-small cell lung cancer. *Am J Public Health*. 1998;88(11):1681-1684.
5. Ramsey SD, Howlader N, Etzioni RD, et al. Chemotherapy use, outcomes, and costs for older persons with advanced non-small-cell lung cancer: evidence from surveillance, epidemiology and end results-Medicare. *J Clin Oncol*. 2004;22(24):4971-4978.
6. Smedley BD, Stith AY, Nelson AR. *Unequal treatment: confronting racial and ethnic disparities in health care*. Institute of Medicine, 2003.
7. Tehranifar P, Neugut AI, Phelan JC, et al. Medical advances and racial/ethnic disparities in cancer survival. *Cancer Epidemiol Biomarkers Prev*. 2009;18(10):2701-2708.
8. Patel MI, Ma Y, Mitchell B, et al. How do differences in treatment impact racial and ethnic disparities in acute myeloid leukemia? *Cancer Epidemiol Biomarkers Prev*. 2015;24(2):344-349.
9. Ward E, Jemal A, Cokkinides V, et al. Cancer disparities by race/ethnicity and socioeconomic status. *CA Cancer J Clin*. 2004;54(2):78-93.
10. Ghafoor A, Jemal A, Ward E, et al. Trends in breast cancer by race and ethnicity. *CA Cancer J Clin*. 2003;53(6):342-355.
11. Jemal A, Siegel R, Ward E, et al. Cancer statistics, 2006. *CA Cancer J Clin*. 2006;56(2):106-130.
12. Siegel R, Ma J, Zou Z, et al. Cancer statistics, 2014. *CA Cancer J Clin*. 2014;64(1):9-29.
13. Hardy D, Liu CC, Xia R, et al. Racial disparities and treatment trends in a large cohort of elderly black and white patients with nonsmall cell lung cancer. *Cancer*. 2009;115(10):2199-2211.
14. Agency for Healthcare Research and Quality. 2014 National Healthcare Quality and Disparities Report. Rockville, MD, 2015.
15. Griggs JJ, Sorbero ME, Stark AT, et al. Racial disparity in the dose and dose intensity of breast cancer adjuvant chemotherapy. *Breast Cancer Res Treat*. 2003;81(1):21-31.
16. Morris AM, Billingsley KG, Hayanga AJ, et al. Residual treatment disparities after oncology referral for rectal cancer. *J Natl Cancer Inst*. 2008;100(10):738-744.
17. Berger M, Lund MJ, Brawley OW. Racial disparities in lung cancer. *Curr Probl Cancer*. 2007;31(3):202-210.
18. Daly B, Olopade OI. A perfect storm: How tumor biology, genomics, and health care delivery patterns collide to create a racial survival disparity in breast cancer and proposed interventions for change. *CA Cancer J Clin*. 2015;65(3):221-238.



19. Hayn MH, Orom H, Shavers VL, et al. Racial/ethnic differences in receipt of pelvic lymph node dissection among men with localized/regional prostate cancer. *Cancer*. 2011;117(20):4651-4658.
20. Penner LA, Eggly S, Griggs JJ, et al. Life-threatening disparities: the treatment of black and white cancer patients. *J Soc Issues*. 2012;68(2).
21. Meghani SH, Kang Y, Chittams J, et al. African Americans with cancer pain are more likely to receive an analgesic with toxic metabolite despite clinical risks: a mediation analysis study. *J Clin Oncol*. 2014;32(25):2773-2779.
22. Hassett MJ, Schymura MJ, Chen K, et al. Variation in breast cancer care quality in New York and California based on race/ethnicity and Medicaid enrollment. *Cancer*. 2015.
23. Phelan JC, Link BG. Is racism a fundamental cause of inequalities in health? *Annual Rev Soc, Vol 41*. 2015;41:311-330.
24. Jean-Pierre P, Fiscella K, Griggs J, et al. Race/ethnicity-based concerns over understanding cancer diagnosis and treatment plan. *J Natl Med Assoc*. 2010;102(3):184-189.
25. Eggly S, Harper FW, Penner LA, et al. Variation in question asking during cancer clinical interactions: a potential source of disparities in access to information. *Patient Educ Couns*. 2011;82(1):63-68.
26. Eggly S, Barton E, Winckles A, et al. A disparity of words: racial differences in oncologist-patient communication about clinical trials. *Health Expect*. 2015;18(5):1316-1326.
27. Gordon HS, Street RL, Jr., Sharf BF, et al. Racial differences in doctors' information-giving and patients' participation. *Cancer*. 2006;107(6):1313-1320.
28. Gordon HS, Street RL, Jr., Sharf BF, et al. Racial differences in trust and lung cancer patients' perceptions of physician communication. *J Clin Oncol*. 2006;24(6):904-909.
29. Siminoff LA, Graham GC, Gordon NH. Cancer communication patterns and the influence of patient characteristics: disparities in information-giving and affective behaviors. *Patient Educ Couns*. 2006;62(3):355-360.
30. Song L, Hamilton JB, Moore AD. Patient-healthcare provider communication: perspectives of African American cancer patients. *Health Psychol*. 2012;31(5):539-547.
31. Penner LA, Dovidio JF, West TV, et al. Aversive racism and medical interactions with black patients: a field study. *J Exp Soc Psychol*. 2010;46(2):436-440.
32. Boulware LE, Cooper LA, Ratner LE, et al. Race and trust in the health care system. *Public Health Rep*. 2003;118(4):358-365.
33. Nguyen GC, LaVeist TA, Harris ML, et al. Patient trust-in-physician and race are predictors of adherence to medical management in inflammatory bowel disease. *Inflamm Bowel Dis*. 2009;15(8):1233-1239.
34. Thompson HS, Valdimarsdottir HB, Winkel G, et al. The Group-Based Medical Mistrust Scale: psychometric properties and association with breast cancer screening. *Prev Med*. 2004;38(2):209-218.
35. Bird ST, Bogart LM. Perceived race-based and socioeconomic status(SES)-based discrimination in interactions with health care providers. *Ethn Dis*. 2001;11(3):554-563.
36. Bird ST, Bogart LM, Delahanty DL. Health-related correlates of perceived discrimination in HIV care. *AIDS Patient Care STDS*. 2004;18(1):19-26.
37. O'Malley AS, Sheppard VB, Schwartz M, et al. The role of trust in use of preventive services among low-income African-American women. *Prev Med*. 2004;38(6):777-785.

- 1
- 2
- 3 38. Green AR, Carney DR, Pallin DJ, et al. Implicit bias among physicians and its prediction
- 4 of thrombolysis decisions for black and white patients. *J Gen Intern Med.*
- 5 2007;22(9):1231-1238.
- 6
- 7 39. Hagiwara N, Penner LA, Gonzalez R, et al. Racial attitudes, physician-patient talk time
- 8 ratio, and adherence in racially discordant medical interactions. *Soc Sci Med.*
- 9 2013;87:123-131.
- 10
- 11 40. Cooper LA, Roter DL, Carson KA, et al. The associations of clinicians' implicit attitudes
- 12 about race with medical visit communication and patient ratings of interpersonal care. *Am*
- 13 *J Public Health.* 2012;102(5):979-987.
- 14
- 15 41. Blair IV, Steiner JF, Fairclough DL, et al. Clinicians' implicit ethnic/racial bias and
- 16 perceptions of care among Black and Latino patients. *Ann Fam Med.* 2013;11(1):43-52.
- 17
- 18 42. Hausmann LR, Myaskovsky L, Niyonkuru C, et al. Examining implicit bias of physicians
- 19 who care for individuals with spinal cord injury: A pilot study and future directions. *J*
- 20 *Spinal Cord Med.* 2015;38(1):102-110.
- 21
- 22 43. Hamel LM, Chapman R, Malloy M, et al. Critical shortage of African American medical
- 23 oncologists in the United States. *J Clin Oncol.* 2015;33(32):3697-3700.
- 24
- 25 44. Kirkwood MK, Kosty MP, Bajorin DF, et al. Tracking the workforce: the American
- 26 Society of Clinical Oncology workforce information system. *J Oncol Pract.* 2013;9(1):3-
- 27 8.
- 28
- 29 45. Cooper-Patrick L, Gallo JJ, Gonzales JJ, et al. Race, gender, and partnership in the
- 30 patient-physician relationship. *JAMA.* 1999;282(6):583-589.
- 31
- 32 46. Cooper LA, Roter DL, Johnson RL, et al. Patient-centered communication, ratings of
- 33 care, and concordance of patient and physician race. *Ann Intern Med.* 2003;139(11):907-
- 34 915.
- 35
- 36 47. Johnson RL, Roter D, Powe NR, et al. Patient race/ethnicity and quality of patient-
- 37 physician communication during medical visits. *Am J Public Health.* 2004;94(12):2084-
- 38 2090.
- 39
- 40 48. Street RL, Jr., Gordon H, Haidet P. Physicians' communication and perceptions of
- 41 patients: is it how they look, how they talk, or is it just the doctor? *Soc Sci Med.*
- 42 2007;65(3):586-598.
- 43
- 44 49. Elliott AM, Alexander SC, Mescher CA, et al. Differences in physicians' verbal and
- 45 nonverbal communication With black and white patients at the end of life. *J Pain*
- 46 *Symptom Manage.* 2016;51(1):1-8.
- 47
- 48 50. Penner LA, Gaertner S, Dovidio JF, et al. A social psychological approach to improving
- 49 the outcomes of racially discordant medical interactions. *J Gen Intern Med.*
- 50 2013;28(9):1143-1149.
- 51
- 52 51. Penner LA, Dovidio JF, Gonzalez R, et al. The effects of oncologist implicit racial bias in
- 53 racially discordant oncology interactions. *J Clin Oncol.* 2016;34(24):2874-2880.
- 54
- 55 52. Penner LA, Harper FWK, Dovidio JF, et al. The impact of Black cancer patients' race-
- 56 related beliefs and attitudes on racially-discordant oncology interactions: A field study.
- 57 *Soc Sci Med.* 2017;191:99-108.
- 58
- 59 53. Penner LA, Blair IV, Albrecht TL, et al. Reducing racial health care disparities: a social
- 60 psychological analysis. *Policy Insights Behav Brain Sci.* 2014;1(1):204-212.
- 54 54. Hamel LM, Manning MA, Penner LA, et al. Racial attitudes and nonverbal convergence
- of patients and physicians in oncology interactions. Published Abstract from the

- 1  
2  
3 Proceedings of the Society of Behavioral Medicine's Annual Meeting. *Annals Behav Med*  
4 2017;51(1\_suppl):S1742.
- 5 55. Richeson JA, Shelton JN. Brief report: Thin slices of racial bias. *J Nonverbal Behav.*  
6 2005;29(1):75-86.
- 7 56. Dovidio JF, Kawakami K, Gaertner SL. Implicit and explicit prejudice and interracial  
8 interaction. *J Person Soc Psychol.* 2002;82(1):62-68.
- 9 57. Dovidio JF, Kawakami K, Johnson C, et al. On the nature of prejudice: Automatic and  
10 controlled processes. *J Exper Soc Psychol.* 1997;33(5):510-540.
- 11 58. Dovidio JF, LaFrance M. Race, ethnicity, and nonverbal behavior. In: Hall JA, Knapp M,  
12 eds. *Nonverbal Communication.* The Hague, The Netherlands: DeGruyter-Mouton;  
13 2013:671-696.
- 14 59. Penner LA, Hagiwara N, Eggly S, et al. Racial healthcare disparities: a social  
15 psychological analysis. *Eur Rev Soc Psychol.* 2013;24(1):70-122.
- 16 60. Kimura M, Daibo I. Interactional synchrony in conversations about emotional episodes:  
17 A measurement by "the between-participants pseudosynchrony experimental paradigm".  
18 *J Nonverbal Behav.* 2006;30(3):115-126.
- 19 61. Condon WS, Ogston WD. Sound film analysis of normal and pathological behavior  
20 patterns. *J Nerv Ment Dis.* 1966;143(4):338-347.
- 21 62. Ramseyer F, Tschacher W. Nonverbal synchrony or random coincidence? How to tell the  
22 difference. *Development of Multimodal Interfaces: Active Listening and Synchrony.*  
23 2010;5967:182-196.
- 24 63. Moulder RG, Boker SM, Ramseyer F, et al. Determining synchrony between behavioral  
25 time series: An application of surrogate data generation for establishing falsifiable null-  
26 hypotheses. *Psychol Methods.* 2018, epub.
- 27 64. Ramseyer F, Tschacher W. Synchrony: a core concept for a constructivist approach to  
28 psychotherapy. *Constructivism in the Human Sciences.* 2006;11:150-171.
- 29 65. Chartrand TL, Lakin JL. The antecedents and consequences of human behavioral  
30 mimicry. *Annual Rev Psychol, Vol 64.* 2013;64:285-308.
- 31 66. White K, Argo JJ. When imitation doesn't flatter: the role of consumer distinctiveness in  
32 responses to mimicry. *J Consumer Res.* 2011;38(4):667-680.
- 33 67. Chartrand TL, Maddux WW, Lakin JL. Beyond the perception-behavior link: The  
34 ubiquitous utility and motivational moderators of nonconscious mimicry. In: Hassin RR,  
35 Uleman JS, Bargh JA, eds. *The New Unconscious:* Oxford University Press; 2005:334-  
36 361.
- 37 68. Vacharkulksemsuk T, Fredrickson BL. Strangers in sync: achieving embodied rapport  
38 through shared movements. *J Exp Soc Psychol.* 2012;48(1):399-402.
- 39 69. Hove MJ, Risen JL. It's all in the timing: interpersonal synchrony increases affiliation.  
40 *Soc Cog.* 2009;27(6):949-960.
- 41 70. Miles LK, Griffiths JL, Richardson MJ, et al. Too late to coordinate: contextual  
42 influences on behavioral synchrony. *Eur J Soc Psychol.* 2010;40(1):52-60.
- 43 71. Miles LK, Lumsden J, Richardson MJ, et al. Do birds of a feather move together? Group  
44 membership and behavioral synchrony. *Exp Brain Res.* 2011;211(3-4):495-503.
- 45 72. Sacheli LM, Christensen A, Giese MA, et al. Prejudiced interactions: implicit racial bias  
46 reduces predictive simulation during joint action with an out-group avatar. *Scientific*  
47 *Reports.* 2015;5.
- 48  
49  
50  
51  
52  
53  
54  
55  
56  
57  
58  
59  
60

- 1
- 2
- 3 73. Paladino MP, Mazzelega M, Pavani F, et al. Synchronous multisensory stimulation blurs self-other boundaries. *Psychol Sci*. 2010;21(9):1202-1207.
- 4
- 5 74. Wiltermuth S. Synchrony and destructive obedience. *Soc Influ*. 2012;7(2):78-89.
- 6
- 7 75. Wiltshire TJ, Steffensen SV, Fiore SM. Multiscale movement coordination dynamics in collaborative team problem solving. *Appl Ergon*. 2018.
- 8
- 9 76. Ramseyer F, Tschacher W. Nonverbal synchrony in psychotherapy: coordinated body movement reflects relationship quality and outcome. *J Consult Clinic Psychol*. 2011;79(3):284-295.
- 10
- 11
- 12 77. Valdesolo P, Ouyang J, DeSteno D. The rhythm of joint action: synchrony promotes cooperative ability. *J Exp Soc Psychol*. 2010;46(4):693-695.
- 13
- 14 78. Macrae CN, Duffy OK, Miles LK, et al. A case of hand waving: action synchrony and person perception. *Cognition*. 2008;109(1):152-156.
- 15
- 16 79. Miles LK, Nind LK, Henderson Z, et al. Moving memories: behavioral synchrony and memory for self and others. *J Exp Soc Psychol*. 2010;46(2):457-460.
- 17
- 18 80. Albrecht TL, Eggly SS, Gleason ME, et al. Influence of clinical communication on patients' decision making on participation in clinical trials. *J Clin Oncol*. 2008;26(16):2666-2673.
- 19
- 20
- 21
- 22
- 23 81. Eggly S, Hamel LM, Foster TS, et al. Randomized trial of a question prompt list to increase patient active participation during interactions with black patients and their oncologists. *Patient Educ Couns*. 2017;100(5):818-826.
- 24
- 25
- 26 82. Penner LA, Orom H, Albrecht TL, et al. Camera-related behaviors during video recorded medical interactions. *J Nonverbal Behav*. 2007;31(2):99-117.
- 27
- 28 83. Riddle DL, Albrecht TL, Coovert MD, et al. Differences in audiotaped versus videotaped physician-patient interactions. *J Nonverbal Behav*. 2002;26(4):219-239.
- 29
- 30
- 31 84. Dugan E, Trachtenberg F, Hall MA. Development of abbreviated measures to assess patient trust in a physician, a health insurer, and the medical profession. *BMC Health Serv Res*. 2005;5:64.
- 32
- 33
- 34 85. Greenwald AG, Nosek BA, Banaji MR. Understanding and using the implicit association test: I. an improved scoring algorithm. *J Pers Soc Psychol*. 2003;85(2):197-216.
- 35
- 36 86. Jacobsen PB. Screening for psychological distress in cancer patients: challenges and opportunities. *J Clin Oncol*. 2007;25(29):4526-4527.
- 37
- 38 87. Stewart M, Brown JB, Weston WW, TR. F. The impact of patient-centered care on outcomes. *J Fam Pract*. 2000;49(9):796-804.
- 39
- 40
- 41 88. Ambady N, Rosenthal R. Thin slices of expressive behavior as predictors of interpersonal consequences - a Metaanalysis. *Psychol Bull*. 1992;111(2):256-274.
- 42
- 43 89. Murphy NA. Using thin slices for behavioral coding. *J Nonverbal Behav*. 2005;29(4):235-246.
- 44
- 45
- 46 90. Roter DL, Hall JA, Blanch-Hartigan D, et al. Slicing it thin: new methods for brief sampling analysis using RIAS-coded medical dialogue. *Patient Educ Counsel*. 2011;82(3):410-419.
- 47
- 48
- 49 91. Roter DL, Hall JA, Aoki Y. Physician gender effects in medical communication: a meta-analytic review. *JAMA*. 2002;288(6):756-764.
- 50
- 51 92. Janssen SM, Lagro-Janssen AL. Physician's gender, communication style, patient preferences and patient satisfaction in gynecology and obstetrics: a systematic review. *Patient Educ Couns*. 2012;89(2):221-226.
- 52
- 53
- 54
- 55
- 56
- 57
- 58
- 59
- 60

93. Schieber AC, Delpierre C, Lepage B, et al. Do gender differences affect the doctor-patient interaction during consultations in general practice? Results from the INTERMEDE study. *Fam Pract*. 2014;31(6):706-713.
94. Inglehart MR. Interactions between patients and dental care providers: does gender matter? *Dent Clin North Am*. 2013;57(2):357-370.
95. Bertakis KD, Azari R. Patient-centered care: the influence of patient and resident physician gender and gender concordance in primary care. *J Womens Health (Larchmt)*. 2012;21(3):326-333.
96. Iacus SM KG, Porro G. Causal inference without balance checking: Coarsened exact matching. *Political Analysis* 2012;20(1):1-24.
97. King GN, R. Why propensity scores should not be used for matching. *Working Paper*. 2016.
98. Austin PC. An introduction to propensity score methods for reducing the effects of confounding in observational studies. *Multivariate Behav Res*. 2011;46(3):399-424.
99. *Motion Energy Analysis (MEA) [Computer software]*. [computer program]. Retrieved from <http://www.psync.ch2016>.
100. Ramseyer F, Tschacher W. Nonverbal synchrony in psychotherapy: Coordinated movement, the therapeutic relationship and outcome. *Internat J Psychol*. 2008;43(3-4):59-59.
101. Boker SM, Xu MQ, Rotondo JL, et al. Windowed cross-correlation and peak picking for the analysis of variability in the association between behavioral time series. *Psychol Methods*. 2002;7(3):338-355.
102. Preacher KJ, Zyphur MJ, Zhang Z. A general multilevel SEM framework for assessing multilevel mediation. *Psychol Methods*. 2010;15(3):209-233.
103. Preacher KJ, Zhang Z, Zyphur MJ. Alternative methods for assessing mediation in multilevel data: the advantages of multilevel SEM. *Structural Equation Modeling-a Multidisciplinary Journal*. 2011;18(2):161-182.

#### Authors' Statement:

LMH: Principal Investigator, involved in all aspects of conceptualization and study design.

RM: Research Assistant, involved in the study design and responsible for design and implementation of statistical analyses.

TLA: Co-Investigator, involved in all aspects of conceptualization and study design.

SB: Co-Investigator, involved in all aspects of conceptualization and study design and responsible for design and implementation of statistical analyses.

SE: Co-Investigator, involved in all aspects of conceptualization and study design.

LAP: Co-Investigator, involved in all aspects of conceptualization and study design.

**Funding:** This work was supported by the National Institutes of Health/National Institute on Minority Health and Health Disparities 1R21MD011766-01A1 (L. Hamel, PI)



1  
2  
3  
4  
5  
6  
7  
8  
9  
10  
11  
12  
13  
14  
15  
16  
17  
18  
19  
20  
21  
22  
23  
24  
25  
26  
27  
28  
29  
30  
31  
32  
33  
34  
35  
36  
37  
38  
39  
40  
41  
42  
43  
44  
45  
46  
47  
48  
49  
50  
51  
52  
53  
54  
55  
56  
57  
58  
59  
60

**Competing interests statement:** The authors have no competing interests to disclose.

For peer review only

1  
2  
3  
4  
5  
6  
7  
8  
9  
10  
11  
12  
13  
14  
15  
16  
17  
18  
19  
20  
21  
22  
23  
24  
25  
26  
27  
28  
29  
30  
31  
32  
33  
34  
35  
36  
37  
38  
39  
40  
41  
42  
43  
44  
45  
46  
47  
48  
49  
50  
51  
52  
53  
54  
55  
56  
57  
58  
59  
60

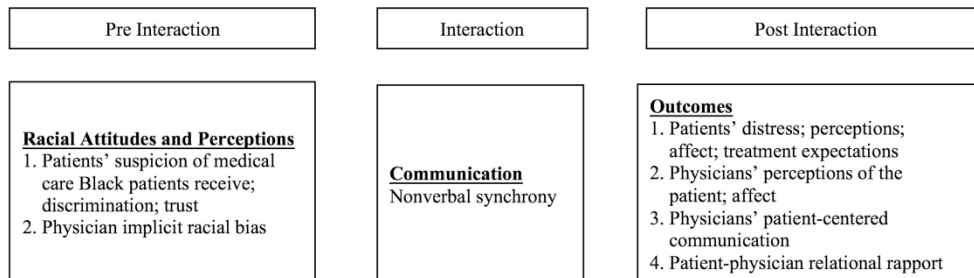

262x76mm (300 x 300 DPI)

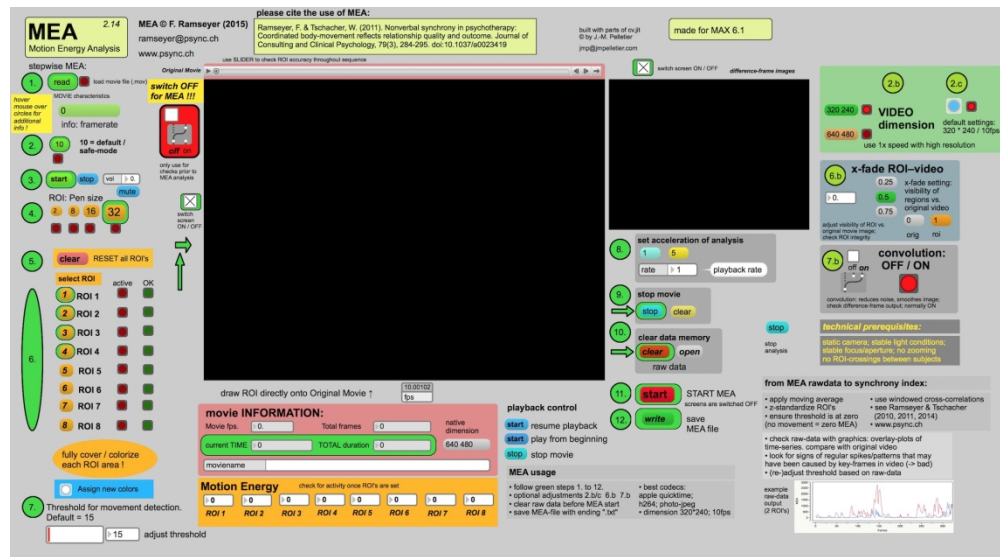

183x101mm (300 x 300 DPI)



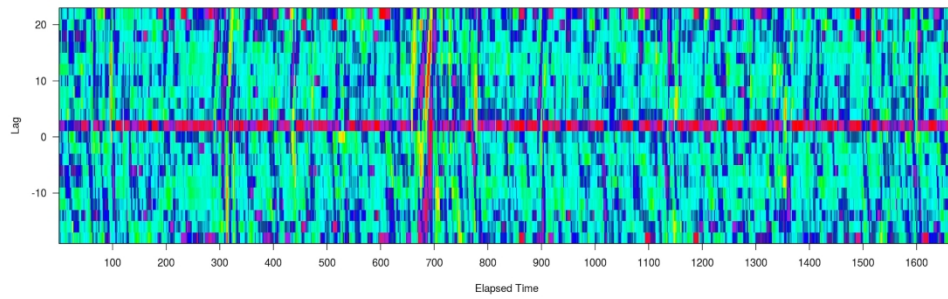

252x76mm (300 x 300 DPI)

# BMJ Open

**Nonverbal synchrony as a behavioral marker of patient and physician race-related attitudes and a predictor of outcomes in oncology interactions: Protocol for a secondary analysis of video-recorded cancer treatment discussions**

|                                 |                                                                                                                                                                                                                                                                                                                                                                                                                      |
|---------------------------------|----------------------------------------------------------------------------------------------------------------------------------------------------------------------------------------------------------------------------------------------------------------------------------------------------------------------------------------------------------------------------------------------------------------------|
| Journal:                        | <i>BMJ Open</i>                                                                                                                                                                                                                                                                                                                                                                                                      |
| Manuscript ID                   | bmjopen-2018-023648.R2                                                                                                                                                                                                                                                                                                                                                                                               |
| Article Type:                   | Protocol                                                                                                                                                                                                                                                                                                                                                                                                             |
| Date Submitted by the Author:   | 04-Oct-2018                                                                                                                                                                                                                                                                                                                                                                                                          |
| Complete List of Authors:       | Hamel, Lauren; Wayne State University/Karmanos Cancer Institute, Oncology<br>Moulder, Robert; University of Virginia, Psychology<br>Albrecht, Terrance; Wayne State University/Karmanos Cancer Institute, Oncology<br>Boker, Steven; University of Virginia, Psychology<br>Eggle, Susan; Wayne State University, Department of Oncology<br>Penner, Louis; Wayne State University/Karmanos Cancer Institute, Oncology |
| <b>Primary Subject Heading</b>: | Communication                                                                                                                                                                                                                                                                                                                                                                                                        |
| Secondary Subject Heading:      | Oncology                                                                                                                                                                                                                                                                                                                                                                                                             |
| Keywords:                       | Disparities, Cancer, Racial discordance, Nonverbal synchrony, Race-related attitudes                                                                                                                                                                                                                                                                                                                                 |
|                                 |                                                                                                                                                                                                                                                                                                                                                                                                                      |

SCHOLARONE™  
Manuscripts

1  
2  
3 **Nonverbal synchrony as a behavioral marker of patient and physician race-related**  
4 **attitudes and a predictor of outcomes in oncology interactions:**  
5 **Protocol for a secondary analysis of video-recorded cancer treatment discussions**  
6

7  
8 Lauren M. Hamel, PhD

9 Corresponding Author

10 Department of Oncology, School of Medicine  
11 Wayne State University/Karmanos Cancer Institute

12 4100 John R. Mailcode: MM03CB

13 Detroit, MI 48201

14 313-576-9672

15 hamell@karmanos.org  
16

17  
18 Robert Moulder, BS

19 Department of Psychology, University of Virginia

20 P.O. Box 400400 Department of Psychology

21 Charlottesville, VA 22903

22 [rgm4fd@virginia.edu](mailto:rgm4fd@virginia.edu)  
23

24  
25 Terrance L. Albrecht, PhD

26 Department of Oncology, School of Medicine

27 Wayne State University/Karmanos Cancer Institute

28 4100 John R. Mailcode: MM03CB

29 Detroit, MI 48201

30 313-576-8262

31 albrecht@karmanos.org  
32

33  
34 Steven Boker, PhD

35 Department of Psychology, University of Virginia

36 Gilmer Hall Room 102

37 Charlottesville, VA 22903

38 434-218-1248

39 smb3u@virginia.edu  
40

41  
42 Susan Eggly, PhD

43 Department of Oncology, School of Medicine

44 Wayne State University/Karmanos Cancer Institute

45 4100 John R. Mailcode: MM03CB

46 Detroit, MI 48201

47 313-576-8260

48 [egglys@karmanos.org](mailto:egglys@karmanos.org)  
49  
50  
51  
52  
53  
54  
55  
56  
57  
58  
59  
60

1  
2  
3 Louis A. Penner, PhD  
4 Department of Oncology, School of Medicine  
5 Wayne State University/Karmanos Cancer Institute  
6 4100 John R. Mailcode: MM03CB  
7 Detroit, MI 48201  
8 313-576-8261  
9 [pennerl@karmanos.org](mailto:pennerl@karmanos.org)  
10  
11

12 Word count: 4,242  
13  
14  
15  
16  
17  
18  
19  
20  
21  
22  
23  
24  
25  
26  
27  
28  
29  
30  
31  
32  
33  
34  
35  
36  
37  
38  
39  
40  
41  
42  
43  
44  
45  
46  
47  
48  
49  
50  
51  
52  
53  
54  
55  
56  
57  
58  
59  
60

For peer review only

## Abstract

**Introduction:** Racial disparities in cancer treatment contribute to racial disparities in mortality rates. The quality of patient-physician communication during clinical interactions with Black patients and non-Black physicians (racially discordant) is poorer than communication quality in with White patients (racially concordant). Patient and physician race-related attitudes affect the quality of this communication. These attitudes are likely expressed through subtle nonverbal behaviors, but prior research has not examined these behaviors. Nonverbal synchrony, the coordination of physical movement, reflects the pre-interaction attitudes of participants in interactions *and* predicts their post-interaction perceptions of and affect toward one another. In this study, peer reviewed and funded by the National Institute of Minority Health and Health Disparities (R21MD011766), we will investigate nonverbal synchrony in racially concordant and discordant interactions to better understand racial disparities in clinical communication.

**Methods and analysis:** This secondary analysis includes racially concordant (n=163) and racially discordant (n=68) video-recorded oncology interactions, patient and oncologist self-reported race-related attitudes, perceptions of the interaction; and observer ratings of physician patient-centered communication and patient and physician affect and rapport. In Aim 1, we will assess and compare nonverbal synchrony between physicians and patients in racially concordant and discordant interactions. In Aim 2, we will determine the influence of nonverbal synchrony on patient and physician affect and communication. In Aim 3, we will examine possible causes (i.e., race-related attitudes) and consequences (i.e., negative perceptions) of nonverbal synchrony in racially discordant interactions. In Aim 4, we will develop and test a mediational model linking physician and patient race-related attitudes to nonverbal synchrony and, in turn, interaction outcomes.

**Ethics and dissemination:** The parent and current studies were approved by the Wayne State University Institutional Review Board. Since only archival data will be used, ethical or safety risks are low. We will disseminate our findings to relevant conferences and journals.

**Key Word: Nonverbal Synchrony; Disparities; Cancer; Racial Discordance; Race-related Attitudes**

**Strengths and limitations of this study:**

- This study explores nonverbal synchrony, a channel of communication that has not been previously examined in medical interactions.
- This study utilizes video-recorded cancer treatment discussions of Black and White patients with cancer, recorded with state-of-art recording equipment.
- This study utilizes automated behavioral coding software, which introduces less error than traditional methods using human coders.
- This study takes advantage of existing datasets, but the video-recorded and self-report data were not collected with the current hypotheses in mind.
- The data are not evenly distributed by sex and race.

## INTRODUCTION

Racial disparities in cancer mortality and treatment are well documented. In the United States, deaths due to cancer are approximately 20% higher for Black patients than for White patients.<sup>1</sup> This mortality disparity remains even after controlling for stage at diagnosis, disease aggressiveness, obesity, comorbidities, physician access, insurance status, and referrals.<sup>2-6</sup> Importantly, this disparity is greatest for the most treatable cancers.<sup>7</sup> This strongly suggests treatment disparities may contribute to mortality disparities.<sup>8-14</sup> For example, Black patients with cancer are less likely to receive chemotherapy for leukemia, breast, lung, and colorectal cancers. If they do receive treatment, it is more likely to be delayed or not adherent to the treatment guidelines set by the National Comprehensive Cancer Network.<sup>2,8,15-23</sup> Multiple causes of these treatment disparities exist including tumor biology, socioeconomic status, environment, and access to care.<sup>6</sup> However, research clearly shows that even when these factors are controlled, racial disparities in treatment remain. We focus on two other contributors to racial disparities in cancer treatments: 1) poor patient-physician communication during oncology interactions,<sup>24-30</sup> and 2) race-related attitudes and perceptions of physicians and patients.<sup>31-42</sup> We are investigating these factors because they account for unique variance in racial treatment disparities.

Black patients experience poorer quality communication during oncology interactions compared to similar interactions with White patients. Due to the small number of Black physicians, especially Black oncologists,<sup>43</sup> about 80% of Black patients' clinical interactions are racially discordant (Black patients, non-Black physicians).<sup>44</sup> Patient-physician communication is often of poorer quality in racially discordant clinical interactions than racially concordant ones. Patients in racially discordant interactions tend to ask fewer questions<sup>25</sup> and are less likely to participate in decision making,<sup>45</sup> whereas physicians tend to be less patient-centered,<sup>46,47</sup> more

1  
2  
3 verbally dominant,<sup>47</sup> more contentious,<sup>48</sup> exhibit fewer rapport building nonverbal behaviors,<sup>49</sup>  
4 and provide less information.<sup>27</sup> Physicians and patients show fewer expressions of positive  
5 affect<sup>47</sup> and relationship-building attempts.<sup>29</sup>  
6  
7  
8  
9

10 Patient and physician race-related attitudes and perceptions affect interaction outcomes via  
11 communication behaviors. Prior research, including our own, suggests that *race-related attitudes*  
12 *and perceptions* (e.g., physician implicit bias against Black people, patient suspicion of medical  
13 care Black people receive) affect communication in clinical interactions and perceptions  
14 physicians and patients have of each other during racially discordant clinical interactions.<sup>31-33,37,38</sup>  
15 For example, physicians with higher levels of implicit (unconscious) bias against Black people  
16 are perceived as less patient-centered and less trustworthy by their Black patients than physicians  
17 with lower levels of implicit bias against Black people.<sup>31,40,41,50</sup> Our prior research suggests such  
18 perceptions and behaviors are associated with less positive patient expectations about  
19 recommended treatments.<sup>51</sup> We have also found that Black patients with higher levels of  
20 suspicion of medical care are less optimistic about outcomes of recommended treatments and are  
21 perceived by their physicians to be less educated.<sup>52</sup> This, in turn, is associated with less positive  
22 physician expectations about how their Black patients will do on a treatment protocol, such as  
23 their adherence and/or ability to tolerate treatment. Given that these attitudes and perceptions are  
24 not directly observable, the only possible way in which they can affect perceptions and  
25 expectations is through their influence on communication behaviors.  
26  
27  
28  
29  
30  
31  
32  
33  
34  
35  
36  
37  
38  
39  
40  
41  
42  
43  
44  
45  
46

47 Relatively little is known about *how* race-related attitudes and perceptions are manifested in  
48 communication behaviors during oncology interactions, or the effects of communication on  
49 interaction outcomes. Our own and others' research has shown that non-Black physicians'  
50 unconscious race-related attitudes (i.e., implicit racial bias) influence their communication with  
51  
52  
53  
54  
55  
56  
57  
58  
59  
60



1  
2  
3 Black patients.<sup>51,53,54</sup> Studies of nonmedical interracial interactions find that implicit bias is more  
4 likely to be expressed through less deliberate nonverbal communication (e.g., facial expressions,  
5 posture) than through more deliberate verbal communication (e.g., spoken words).<sup>55-58</sup> Black  
6 patients' communication may be driven more by explicit than implicit race-related attitudes and  
7 perceptions,<sup>59</sup> but its expression may also be subtle and involve less deliberate communication  
8 (e.g., nonverbal behaviors).<sup>54</sup> The behavioral channels through which these race-related attitudes  
9 and perceptions are expressed are not known, but nonverbal synchrony is a promising candidate  
10 as one of them.

11  
12  
13  
14  
15  
16  
17  
18  
19  
20  
21  
22  
23  
24  
25  
26  
27  
28  
29  
30  
31  
32  
33  
34  
35  
36  
37  
38  
39  
40  
41  
42  
43  
44  
45  
46  
47  
48  
49  
50  
51  
52  
53  
54  
55  
56  
57  
58  
59  
60  
Nonverbal synchrony is the coordination of physical movement that occurs between two  
individuals during an interaction.<sup>60</sup> The construct of synchrony was first introduced more than 50  
years ago and has sparked many related areas of study.<sup>61</sup> Here, we consider nonverbal synchrony  
as a dynamic and jointly determined phenomenon, not focused on any particular behavior (e.g.,  
posture, eye contact). Rather, we consider nonverbal synchrony as a form of behavioral matching  
between two individuals. This matching does not have to occur at the same time (as it would for  
two people dancing), but it must involve similar kinds of motion and exhibit some sort of  
coordinated back-and-forth between individuals.<sup>62-64</sup> As an example, an individual shaking his or  
her head while another individual waves his or her hand would exhibit nonverbal synchrony but  
they are not mirroring one another nor are they perfectly in time.<sup>63</sup>

Considerable prior laboratory-based research shows that nonverbal synchrony is often  
unconscious, unintentional, and effortless.<sup>65-67</sup> However, nonverbal synchrony can be predicted  
by pre-interaction attitudes<sup>68</sup> and has post-interaction consequences.<sup>69</sup> People synchronize more  
with others with whom they have positive relationships,<sup>70</sup> those with whom they want to develop  
positive relationships,<sup>71</sup> and others whom they trust.<sup>68</sup> In a recent experimental laboratory-based

1  
2  
3 study, individuals with higher implicit bias favoring their own race synchronized more with an  
4 avatar of their own race than with an avatar of a different race.<sup>72</sup> In terms of nonverbal  
5 synchrony's role as a predictor, nonverbal synchrony reflects more subsequent positive affect  
6 and liking,<sup>69</sup> perceptions of similarity, closeness, rapport with the interaction partner, and  
7 collaborative problem solving.<sup>68,73-75</sup> More relevant to clinical communication, nonverbal  
8 synchrony has been found to positively influence therapeutic processes,<sup>76</sup> cooperation,<sup>77</sup>  
9 obedience,<sup>74</sup> and memory for information provided by the interaction partner.<sup>78,79</sup> It is because of  
10 this previous research that we will investigate general nonverbal synchrony in this study, rather  
11 than, for example, vocal synchrony or synchrony of more precise behaviors such as eye gaze.  
12  
13  
14  
15  
16  
17  
18  
19  
20  
21  
22  
23

24 To summarize, current evidence indicates that Black patients and non-Black physicians  
25 have negative reactions to each other's race-related attitudes and perceptions. Also, evidence  
26 indicates that these attitudes and perceptions are subtly manifested in communication. Little is  
27 known, however, about the channels through which these attitudes and perceptions are  
28 communicated. Because nonverbal synchrony is subtle, unintentional, automatic, and affect-  
29 laden, it may likely serve as a behavioral marker of race-related attitudes and perceptions. Here  
30 we describe the protocol for a study that will help fill this gap in understanding by examining the  
31 role of nonverbal synchrony in racially concordant and racially discordant oncology interactions.  
32 The study was designed to achieve the following *aims* and *hypotheses*, which are based on the  
33 research reviewed:  
34  
35  
36  
37  
38  
39  
40  
41  
42  
43  
44  
45

46  
47 Aim 1: Assess and compare nonverbal synchrony between physicians and patients in  
48 racially concordant and racially discordant oncology interactions.  
49

50  
51 Hypothesis 1: Nonverbal synchrony will be greater in racially concordant than in  
52 racially discordant oncology interactions.  
53  
54  
55  
56  
57  
58  
59  
60

1  
2  
3 Aim 2: Determine the influence of nonverbal synchrony on physician communication  
4 style (e.g., level of patient-centeredness) and patient and physician affect in racially  
5 concordant and racially discordant oncology interactions.  
6  
7  
8

9  
10 Hypothesis 2: Nonverbal synchrony will positively influence physician patient-  
11 centered communication, patient and physician affect, and relational rapport in  
12 racially concordant and racially discordant clinical interactions.  
13  
14  
15

16  
17 Aim 3: Examine the antecedents and outcomes of nonverbal synchrony in racially  
18 discordant oncology interactions.  
19  
20

21 Hypothesis 3: In racially discordant oncology interactions, nonverbal synchrony  
22 will significantly negatively covary with patient post-interaction distress and  
23 positively covary with 1) patient post-interaction perceptions of physicians'  
24 patient-centered communication and treatment expectations; 2) physicians' post-  
25 interaction perceptions of patient personal characteristics (e.g., understanding of  
26 treatment options) and their responses to treatment (e.g., willingness to follow  
27 treatment regimen), and 3) observers' ratings of physician patient-centered  
28 communication, patient and physician affect, and relational rapport.  
29  
30  
31  
32  
33  
34  
35  
36  
37  
38

39 Hypothesis 4: Nonverbal synchrony will significantly covary with pre-interaction  
40 race-related attitudes and perceptions of the patient and physicians (e.g. physician  
41 implicit bias; patient suspicion).  
42  
43  
44  
45  
46

47 Aim 4: Develop and test a mediational model that links physician and patient race-related  
48 attitudes and perceptions to nonverbal synchrony and, in turn, outcomes of racially  
49 discordant oncology interactions.  
50  
51  
52  
53  
54  
55  
56  
57  
58  
59  
60

1  
2  
3 Hypothesis 5: Nonverbal synchrony will mediate the relationship between pre-  
4 interaction race-related attitudes and perceptions and post-interaction perceptions  
5 of the patients and physicians.  
6  
7  
8  
9  
10  
11

## 12 **METHODS AND ANALYSIS**

13  
14 **Overview of proposed study.** Our goals are to: 1) compare the extent to which physicians and  
15 patients synchronize their behavior in racially concordant and racially discordant oncology  
16 interactions; 2) compare the associations between nonverbal synchrony and self-report and  
17 observational measures of patient and physician affect and physicians' patient-centered  
18 communication in racially concordant and racially discordant oncology interactions; 3)  
19 investigate how race-related attitudes and perceptions (e.g., physician implicit bias, patient  
20 suspicion) affect nonverbal synchrony in racially discordant oncology interactions; 4) investigate  
21 how nonverbal synchrony affects the outcomes of racially discordant clinical interactions; and 5)  
22 test the conceptual model in Figure 1, which predicts that race-related attitudes and perceptions  
23 will be associated with patient and physician perceptions and treatment-related outcomes of  
24 racially discordant oncology interactions, through their influence on nonverbal synchrony. To  
25 achieve these goals, we will conduct a secondary analysis of data from two studies conducted by  
26 members of our study team. This secondary analysis was officially funded in September 2017.  
27 Thus, it is ongoing and will be completed by August 2019. **Study One**, which was funded by the  
28 National Cancer Institute (NCI), was conducted at two NCI-designated comprehensive cancer  
29 centers between April 2002 and March 2006 (R01CA75003),<sup>80</sup> was an investigation of how  
30 patient-oncologist communication influences patients' decision making about treatment  
31 including clinical trials. **Study Two** (also funded by the NCI), was conducted at one of the **Study**  
32  
33  
34  
35  
36  
37  
38  
39  
40  
41  
42  
43  
44  
45  
46  
47  
48  
49  
50  
51  
52  
53  
54  
55  
56  
57  
58  
59  
60

1  
2  
3 **One** NCI-designated centers plus another large urban cancer clinic in the same city between  
4  
5 April 2012 and December 2014. **Study Two** investigated associations between communication  
6  
7 and outcomes during racially discordant oncology interactions (U54CA153606-04).<sup>81</sup> Only  
8  
9 patients and oncologists from these studies who agreed on their consent forms to allow their  
10  
11 video-recorded and self-reported data to be used in secondary analyses will be used in the current  
12  
13 study. Comparisons of groups did not find any socio-demographic or attitudinal differences  
14  
15 between patients/oncologists who did and did not agree to be in secondary analyses.  
16  
17  
18

### 19 **Data Sources.**

20  
21 *Participants, Procedures, and Measures in Study One.* Patients from **Study One** who are in the  
22  
23 current study include 163 self-identified White (92 male; 71 female) patients who were meeting  
24  
25 with a White medical oncologist for the first time to discuss treatment for their cancer. Upon  
26  
27 consent, which occurred immediately prior to meeting their oncologist, patients completed a  
28  
29 survey assessing their sociodemographic characteristics. Oncologists were 22 White male  
30  
31 medical oncologists (no female oncologists participated in **Study One**) who saw at least one  
32  
33 participating patient ( $M = 7.4$   $SD = 7.0$ ). Upon consent, oncologists completed a demographic  
34  
35 survey. Exam rooms were equipped with unobtrusive digital audio and video recording devices.  
36  
37 Studies have demonstrated the nonreactance to the recording process,<sup>82</sup> and enhanced validity  
38  
39 compared to audio recording alone.<sup>83</sup>  
40  
41  
42  
43

44  
45 *Participants, Procedures, and Measures in Study Two.* Patients from **Study Two** who are in the  
46  
47 current study include 68 Black female patients who were meeting with a non-Black medical  
48  
49 oncologist for the time to discuss treatment for their cancer. While patients were recruited for  
50  
51 **Study Two** irrespective of sex, only 6 of the patients who enrolled were males. A meaningful  
52  
53 statistical comparison on the variables of interest by patient sex cannot be conducted with so few  
54  
55  
56  
57  
58  
59  
60

1  
2  
3 male participants. Thus, we are excluding them from further analyses. Upon consent, patients  
4 provided sociodemographic information and completed measures of suspicion of medical care  
5  
6 Black patients receive<sup>34</sup> and trust in medical institutions.<sup>84</sup> There were 16 medical oncologists (7  
7 females; 9 males; 8 White; 6 Asian/Pacific Islander; 2 Arab/Middle Eastern) who saw at least  
8 one participating patient ( $M = 5.2$ ,  $SD = 6.4$ ). Upon consent, oncologists completed a  
9 demographic survey and the Implicit Association Test, which assesses implicit racial bias against  
10 Black people.<sup>85</sup> Just as in **Study One**, exam rooms in **Study Two** were equipped with  
11 unobtrusive digital audio and video recording devices.  
12  
13  
14  
15  
16  
17  
18  
19  
20

21 In **Study Two**, oncologists were consented upon enrollment, and the video-recorded  
22 clinical interactions took place within two weeks after patients consented. Immediately after the  
23 interactions, patients completed measures of distress,<sup>86</sup> perception of the physicians' patient-  
24 centered communication,<sup>87</sup> and expectations about recommended treatment. Also, immediately  
25 after interactions, oncologists completed measures of perceptions of the patient and how well the  
26 patient would do in treatment. One week later, patients reported their level of trust in their  
27 oncologist<sup>84</sup> in a telephone survey. Trained observers later observed and rated video-recorded  
28 interactions to assess physicians' patient-centered communication.<sup>48</sup> To do this, coders applied a  
29 global scale of physicians' patient-centered communication which assessed physicians'  
30 informativeness (e.g., "the doctor thoroughly explained everything to the patient");  
31 supportiveness (e.g., "the doctor made the patient feel completely at ease during the  
32 consultation"); and partnership building (e.g., "the doctor encouraged the patient to express  
33 concerns and worries").<sup>48</sup> At least two observers rated physicians' patient-centered  
34 communication (three observers rated 15% of interactions to ensure continued reliability); inter-  
35  
36  
37  
38  
39  
40  
41  
42  
43  
44  
45  
46  
47  
48  
49  
50  
51  
52  
53  
54  
55  
56  
57  
58  
59  
60

1  
2  
3 rater reliability was acceptable (intra-class correlation coefficient = .57-.74,  $p$ 's<.05). Each  
4  
5 physician's patient-centered communication score was the average of observer ratings.  
6

7  
8 Five one-minute video slices were created from each of the recordings from the two  
9  
10 studies (N = 340 slices) by dividing each video recording into five equal segments and selecting  
11  
12 the first minute from each segment.<sup>55,88-90</sup> The slices were observed and rated by naïve observers  
13  
14 who had no training other than instructions to provide their ratings for patient and physician  
15  
16 affect (e.g. warm/friendly) and relational rapport (e.g. attentive). The use of naïve observers is  
17  
18 consistent with this type of methodology.<sup>55,88</sup>  
19  
20

## 21 **Hypotheses and Data Analysis.**

22  
23  
24 **Aim 1: Assess and compare nonverbal synchrony between physicians and patients in**  
25  
26 **racially concordant and racially discordant oncology interactions.** We will achieve this aim  
27  
28 by first matching video recordings from **Study One** and **Study Two** on patient and physician sex  
29  
30 and other sociodemographics. Although our focus is on racial concordance/discordance, prior  
31  
32 research suggests that patient and physician sex affects communication in medical interactions.<sup>91-</sup>  
33  
34  
35 <sup>95</sup> However, as described above, matching on sex is constrained by the distributions in the  
36  
37 original recordings. Thus, from **Study One**, we will use 71 White female patients and 92 White  
38  
39 male patients who interacted with White male physicians. From **Study Two**, we will use the 34  
40  
41 Black female patient/non-Black male physician dyads and 34 Black female patient/non-Black  
42  
43 female physician dyads. Thus, within race concordant and race discordant interactions we will  
44  
45 examine the effects of sex concordance and discordance. We acknowledge that this is not a full  
46  
47 factorial design, but it will permit us to examine the influence of race concordance/discordance  
48  
49 on nonverbal synchrony and, also partially examine whether the influence of race on nonverbal  
50  
51 synchrony is moderated by patient and physician sex. To minimize any other differences  
52  
53  
54  
55  
56  
57  
58  
59

1  
2  
3 between Black patients and White patients, we will also do block matching of patients from  
4 **Study One** with patients from **Study Two** on characteristics that might affect nonverbal  
5 communication (e.g., age, type of cancer). We expect this matching will reduce the number of  
6 patients available from **Study One** by 20-30% percent, but sufficient cases will be available for  
7 well-powered analyses of racial concordance/discordance. We will then further the equivalence  
8 of patients with advanced methods of propensity scoring.<sup>96-98</sup>

9  
10 We will assess nonverbal synchrony in all matched interactions using customized Motion  
11 Energy Analysis (<http://psync.ch/?p=9>)<sup>76,99</sup> software to obtain synchrony scores for each  
12 interaction. Figure 2 is a screenshot of the Motion Energy Analysis software. Motion Energy  
13 Analysis is an objective automated method that continuously monitors the amount of movement  
14 occurring in pre-defined regions of interest.<sup>62,76,100</sup> Motion Energy Analysis captures frame-by-  
15 frame movement and provides quantification of change in movement in the “regions of interest”.  
16 In this study, we consider each individual as one “region of interest,” allowing us to capture full  
17 body movement. Motion Energy Analysis uses pixel-differencing methods to measure total  
18 amount of movement. We will quantify nonverbal synchrony by deriving scores using windowed  
19 cross-correlation matrices to obtain synchrony scores for each interaction.<sup>101</sup> Nonverbal  
20 synchrony tends to ebb and flow during conversations.<sup>91</sup> Windowed cross-correlation accounts  
21 for the possibility of changing synchronization by comparing small sections of time at different  
22 time lags. By looking at multiple smaller sections at multiple different lags, windowed cross-  
23 correlation is able to estimate synchronization between systems which do not have a constant  
24 lag. Figure 3 is windowed cross-correlation output displayed as a heat map with warmer colors  
25 representing strong positive correlations between the two individuals’ behavior (e.g., positive  
26 nonverbal synchrony) and cooler colors representing strong negative correlations (e.g., negative  
27  
28  
29  
30  
31  
32  
33  
34  
35  
36  
37  
38  
39  
40  
41  
42  
43  
44  
45  
46  
47  
48  
49  
50  
51  
52  
53  
54  
55  
56  
57  
58  
59  
60



1  
2  
3 nonverbal synchrony). These synchrony scores are dyadic attributes that represent amounts and  
4 relationships of synchronous movement within dyads. Once we have obtained these scores, we  
5 will compare (a) effects of race concordance versus discordance on nonverbal synchrony and (b)  
6 effects of sex concordance versus discordance on nonverbal synchrony, and (c) determine the  
7 relative impact of race concordance/discordance versus sex concordance/discordance on  
8 nonverbal synchrony.  
9

10  
11  
12 *Hypothesis 1: Nonverbal synchrony will be greater in racially concordant than in racially*  
13 *discordant oncology interactions.* To obtain time-varying synchrony scores, we will block each  
14 interaction into five equal segments and obtain synchrony scores for each segment using Motion  
15 Energy Analysis. This procedure also allows us to adjust for patients and physicians moving  
16 outside of the regions of interest set at the beginning of each segment and maximizes the  
17 likelihood that we capture all patient and physician movement. For example, this strategy will  
18 help us capture continuous movement even if a patient or physician gets up from a seated  
19 position and walks outside of the pre-determined region of interest. To model changes in  
20 dynamic and overall levels of synchrony, we will use structural equation modeling (SEM)  
21 methods, latent differential equations (LDE), and multi-level modeling (MLM) methods. LDE is  
22 a special case of SEM that allows for estimation of parameters of a proposed underlying  
23 dynamical system. LDE models contain parameters pertaining to the dynamics of a given system  
24 (e.g., “eta” and “zeta” parameters of a latent harmonic oscillator model). We will use multi-  
25 group SEM modeling to test for differences in these parameters between racially concordant and  
26 racially discordant interactions. By using a likelihood ratio test comparing two models where 1)  
27 these dynamic parameters are free to vary and 2) where these parameters are constrained to be  
28 equal across models, we will be able to determine if the motion dynamics differ between racially  
29  
30  
31  
32  
33  
34  
35  
36  
37  
38  
39  
40  
41  
42  
43  
44  
45  
46  
47  
48  
49  
50  
51  
52  
53  
54  
55  
56  
57  
58  
59  
60

1  
2  
3 concordant and racially discordant interactions. Using a three-level HLM model with time  
4 segments (level 1) nested within patient (level 2), and patient nested within physician (level 3),  
5 we will model changes in nonverbal synchrony based on a categorical variable modeling either  
6 racially concordant or racially discordant interactions. Assuming 168 dyads, an alpha of .05, a  
7 correlation coefficient of .1, and a linear time effect, we have a power of .8 to detect an effect  
8 size of .50.  
9

10  
11  
12  
13  
14  
15  
16  
17 **Aim 2: Determine the influence of nonverbal synchrony on physician communication and**  
18 **patient and physician affect in racially concordant and racially discordant oncology**  
19 **interactions.** We will first collect the same observational measures for **Study One** as in **Study**  
20 **Two**, including physician patient-centered communication and patient and physician affect, and  
21 rapport. Trained research assistants will rate each of the racially concordant interactions on  
22 physicians' patient-centered communication.<sup>48</sup> Next, we will create thin slices of the interactions  
23 from **Study One** and naïve observers will rate the slices using the same measures of physician-  
24 patient affect and rapport as in **Study Two**. Then we will use the synchrony scores from Aim 1  
25 to compare the relationship between nonverbal synchrony and patient-physician affect and  
26 rapport in racially concordant and discordant interactions.  
27  
28  
29  
30  
31  
32  
33  
34  
35  
36  
37  
38  
39

40 *Hypothesis 2: Nonverbal synchrony will influence physician patient-centered communication,*  
41 *patient and physician affect, and relational rapport in racially concordant and racially*  
42 *discordant clinical interactions.* We will use MLM and multi-group SEM to create a mediation  
43 model where nonverbal synchrony will predict level-2 (patient) and level-3 (physician)  
44 outcomes. Assuming 168 dyads, an alpha of .05, and a correlation coefficient of .1, we have  
45 power of .8 to detect an effect size of .48.  
46  
47  
48  
49  
50  
51  
52  
53  
54  
55  
56  
57  
58  
59  
60

1  
2  
3 **Aim 3: Examine the antecedents and outcomes of nonverbal synchrony in racially**  
4 **discordant oncology interactions.** We will achieve this aim using the synchrony scores from  
5  
6 the racially discordant interactions in **Study Two**. We will examine the relationships between  
7  
8 nonverbal synchrony and 1) interaction outcomes collected in the parent study including: patient  
9  
10 satisfaction, distress, perception of physicians' patient-centered communication, and treatment  
11  
12 expectations, and physician perceptions of the patient (e.g., willingness to follow treatment  
13  
14 regimen), and 2) pre-interaction physician and patient race-related attitudes and perceptions (e.g.,  
15  
16 implicit bias; suspicion), also collected in the parent study.  
17  
18  
19

20  
21 *Hypothesis 3: In the racially discordant oncology interactions, nonverbal synchrony will*  
22 *significantly negatively covary with patient post-interaction distress and positively covary with*  
23 *1) patient post-interaction perceptions of physicians' patient-centered communication and*  
24 *treatment expectations; 2) physicians' post-interaction perceptions of patient personal*  
25 *characteristics (e.g., understanding of treatment options) and their responses to treatment (e.g.,*  
26 *willingness to follow treatment regimen); and 3) observers' ratings of physician patient-centered*  
27 *communication, patient and physician affect, and relational rapport. Using LDE, we will model*  
28 *dynamic parameter values of the fluctuations in nonverbal synchrony over the course of each*  
29 *interaction. These values will then be used as first-level predictors in an MLM model. The*  
30 *second-level predictors for this model will be values associated with physician and patient post-*  
31 *interaction perceptions of the interaction and of each other. Assuming 68 dyads, an alpha of .05,*  
32 *and a correlation coefficient of .1, we have a power of .9 to detect an effect size of .56.*  
33  
34  
35  
36  
37  
38  
39  
40  
41  
42  
43  
44  
45  
46  
47  
48

49 *Hypothesis 4: Nonverbal synchrony will significantly covary with pre-interaction race-related*  
50 *attitudes and perceptions of the patient and physicians (e.g. physician implicit bias, patient*  
51 *suspicion). We will create a three-level MLM. We will model synchrony assessed over five time*  
52  
53  
54  
55  
56  
57  
58  
59

1  
2  
3 segments nested within each patient and each patient nested within physician. Each patient-  
4  
5 physician dyad will have its own average synchrony score.  
6

7  
8 **Aim 4: Develop and test a mediational model that links physician and patient race-related**  
9  
10 **attitudes and perceptions to nonverbal synchrony and, in turn, outcomes of race-related**  
11 **discordant oncology interactions.**  
12

13  
14  
15 *Hypothesis 5: Nonverbal synchrony will mediate the relationship between pre-interaction race-*  
16  
17 *related attitudes and perceptions and post-interaction perceptions of the patients and physicians.*  
18

19 To examine the proposed mediations in a multilevel context, we will utilize multi-level SEM, as  
20 described by Preacher and colleagues.<sup>102,103</sup> These models address potential conflated estimates  
21 of mediated effects that can arise when using multi-level data. Time segments will be nested  
22 within each patient and each patient will be nested within physician, with synchrony varying at  
23 each time point. We will use a single mediation model to assess how physician and patient race-  
24 related attitudes and perceptions influence interaction outcomes via their influence on nonverbal  
25 synchrony.  
26  
27  
28  
29  
30  
31  
32  
33  
34

### 35 **Patient and Public Involvement.**

36  
37 Cancer survivors were heavily involved with both **Study One** and **Study Two**.  
38 Investigators had extensive conversations with survivors about their experiences as patients and  
39 survivors, which helped guide the research questions, measured outcomes, and design of both  
40 studies.  
41  
42  
43  
44  
45

46  
47 Patients were not directly involved with developing the research questions and outcomes  
48 for this secondary analysis. However, this work extends naturally from the considerable previous  
49 work we have done focused on understanding and improving patient-oncologist communication  
50 for all patients, with special attention to patients more vulnerable to cancer treatment and  
51  
52  
53  
54  
55  
56  
57  
58  
59  
60

1  
2  
3 mortality disparities. This secondary analysis will investigate another important aspect of patient-  
4 physician communication that our patient and physician partners have agreed needs research  
5 attention.  
6  
7  
8  
9

10 Recruitment to both **Study One** and **Study Two** was done by the investigators and their  
11 research and clinic staff. As PI, Dr. Hamel will disseminate results from this investigation  
12 through the Karmanos Cancer Institutes' Department of Community Outreach and Education,  
13 which has regularly scheduled meetings with cancer survivors, caretakers, and community  
14 stakeholders.  
15  
16  
17  
18  
19  
20

## 21 **ETHICS AND DISSEMINATION**

22 Studies one (069003B3D), two (125211B3E), and the current study (044716B3E) are all  
23 approved by the Wayne State University Institutional Review Board. Only patients and  
24 physicians from the previous studies who provided their consent for secondary analyses of their  
25 data were included in the current study. The nature of the data makes it unlikely we will  
26 encounter ethical or safety issues.  
27  
28  
29  
30  
31  
32  
33  
34

35 We will submit our ongoing findings to relevant communication, social psychology, and  
36 oncology conferences. Similarly, we plan to submit the final manuscripts to high-impact  
37 communication, social psychology, and oncology peer-reviewed journals.  
38  
39  
40  
41

## 42 **STRENGTHS AND LIMITATIONS**

43 This secondary analysis is innovative in its focus and method. This study explores nonverbal  
44 synchrony, a channel of communication that has not been previously examined in medical  
45 interactions. It takes advantage of existing datasets, which include video-recorded cancer  
46 treatment discussions of Black and White patients with cancer, recorded with state-of-art  
47  
48  
49  
50  
51  
52  
53  
54  
55  
56  
57  
58  
59

1  
2  
3 recording equipment. It also applies automated behavioral coding software, thus introducing less  
4 error than traditional methods using human coders.  
5  
6

7  
8 However, this study is not without limitations. First, this study takes advantage of  
9 existing datasets, but the video-recorded and self-report data were not collected with the current  
10 hypotheses in mind. Second, the data are not evenly distributed by sex and race. As is often the  
11 case with medical research involving actual patients, the distributions of study patient  
12 characteristics are constrained by the distributions of patient demographic and medical  
13 characteristics of the patients that are treated at the participating hospitals. This reality precludes  
14 us from fully examining all combinations of race and sex. However, there are advantages to the  
15 fact that this research is conducted in a real-world, rather than a laboratory setting; also, we are  
16 able to account for some variability in our models by treating certain factors (e.g., cancer type) as  
17 random effects. Last, although given a design that is adequately powered to make both between-  
18 and within-subject comparisons, it is still possible we may find no significant findings regarding  
19 nonverbal synchrony. Of course, this finding would be interesting in and of itself and would  
20 direct research attention to other avenues of investigation.  
21  
22  
23  
24  
25  
26  
27  
28  
29  
30  
31  
32  
33  
34  
35  
36  
37  
38  
39

#### 40 **FIGURE LEGEND**

41  
42 Figure 1: Conceptual Model  
43

44  
45 Figure 2: Motion Energy Analysis Software  
46  
47

48  
49 Figure 3: Window Cross Correlation Output  
50  
51  
52  
53  
54  
55  
56  
57  
58  
59  
60

## REFERENCES

1. National Center for Health Statistics. *Health, United States, 2015: with special feature on racial and ethnic health disparities*. Hyattsville, MD, 2016.
2. Murphy CC, Harlan LC, Warren JL, et al. Race and insurance differences in the receipt of adjuvant chemotherapy among patients with stage III colon cancer. *J Clin Oncol*. 2015;33(23):2530-2536.
3. Bach PB, Schrag D, Brawley OW, et al. Survival of blacks and whites after a cancer diagnosis. *JAMA*. 2002;287(16):2106-2113.
4. Greenwald HP, Polissar NL, Borgatta EF, et al. Social factors, treatment, and survival in early-stage non-small cell lung cancer. *Am J Public Health*. 1998;88(11):1681-1684.
5. Ramsey SD, Howlader N, Etzioni RD, et al. Chemotherapy use, outcomes, and costs for older persons with advanced non-small-cell lung cancer: evidence from surveillance, epidemiology and end results-Medicare. *J Clin Oncol*. 2004;22(24):4971-4978.
6. Smedley BD, Stith AY, Nelson AR. *Unequal treatment: confronting racial and ethnic disparities in health care*. Institute of Medicine, 2003.
7. Tehranifar P, Neugut AI, Phelan JC, et al. Medical advances and racial/ethnic disparities in cancer survival. *Cancer Epidemiol Biomarkers Prev*. 2009;18(10):2701-2708.
8. Patel MI, Ma Y, Mitchell B, et al. How do differences in treatment impact racial and ethnic disparities in acute myeloid leukemia? *Cancer Epidemiol Biomarkers Prev*. 2015;24(2):344-349.
9. Ward E, Jemal A, Cokkinides V, et al. Cancer disparities by race/ethnicity and socioeconomic status. *CA Cancer J Clin*. 2004;54(2):78-93.
10. Ghafoor A, Jemal A, Ward E, et al. Trends in breast cancer by race and ethnicity. *CA Cancer J Clin*. 2003;53(6):342-355.
11. Jemal A, Siegel R, Ward E, et al. Cancer statistics, 2006. *CA Cancer J Clin*. 2006;56(2):106-130.
12. Siegel R, Ma J, Zou Z, et al. Cancer statistics, 2014. *CA Cancer J Clin*. 2014;64(1):9-29.
13. Hardy D, Liu CC, Xia R, et al. Racial disparities and treatment trends in a large cohort of elderly black and white patients with nonsmall cell lung cancer. *Cancer*. 2009;115(10):2199-2211.
14. Agency for Healthcare Research and Quality. 2014 National Healthcare Quality and Disparities Report. Rockville, MD, 2015.
15. Griggs JJ, Sorbero ME, Stark AT, et al. Racial disparity in the dose and dose intensity of breast cancer adjuvant chemotherapy. *Breast Cancer Res Treat*. 2003;81(1):21-31.



16. Morris AM, Billingsley KG, Hayanga AJ, et al. Residual treatment disparities after oncology referral for rectal cancer. *J Natl Cancer Inst.* 2008;100(10):738-744.
17. Berger M, Lund MJ, Brawley OW. Racial disparities in lung cancer. *Curr Probl Cancer.* 2007;31(3):202-210.
18. Daly B, Olopade OI. A perfect storm: How tumor biology, genomics, and health care delivery patterns collide to create a racial survival disparity in breast cancer and proposed interventions for change. *CA Cancer J Clin.* 2015;65(3):221-238.
19. Hayn MH, Orom H, Shavers VL, et al. Racial/ethnic differences in receipt of pelvic lymph node dissection among men with localized/regional prostate cancer. *Cancer.* 2011;117(20):4651-4658.
20. Penner LA, Eggly S, Griggs JJ, et al. Life-threatening disparities: the treatment of black and white cancer patients. *J Soc Issues.* 2012;68(2).
21. Meghani SH, Kang Y, Chittams J, et al. African Americans with cancer pain are more likely to receive an analgesic with toxic metabolite despite clinical risks: a mediation analysis study. *J Clin Oncol.* 2014;32(25):2773-2779.
22. Hassett MJ, Schymura MJ, Chen K, et al. Variation in breast cancer care quality in New York and California based on race/ethnicity and Medicaid enrollment. *Cancer.* 2015.
23. Phelan JC, Link BG. Is racism a fundamental cause of inequalities in health? *Annual Rev Soc, Vol 41.* 2015;41:311-330.
24. Jean-Pierre P, Fiscella K, Griggs J, et al. Race/ethnicity-based concerns over understanding cancer diagnosis and treatment plan. *J Natl Med Assoc.* 2010;102(3):184-189.
25. Eggly S, Harper FW, Penner LA, et al. Variation in question asking during cancer clinical interactions: a potential source of disparities in access to information. *Patient Educ Couns.* 2011;82(1):63-68.
26. Eggly S, Barton E, Winckles A, et al. A disparity of words: racial differences in oncologist-patient communication about clinical trials. *Health Expect.* 2015;18(5):1316-1326.
27. Gordon HS, Street RL, Jr., Sharf BF, et al. Racial differences in doctors' information-giving and patients' participation. *Cancer.* 2006;107(6):1313-1320.
28. Gordon HS, Street RL, Jr., Sharf BF, et al. Racial differences in trust and lung cancer patients' perceptions of physician communication. *J Clin Oncol.* 2006;24(6):904-909.
29. Siminoff LA, Graham GC, Gordon NH. Cancer communication patterns and the influence of patient characteristics: disparities in information-giving and affective behaviors. *Patient Educ Couns.* 2006;62(3):355-360.
30. Song L, Hamilton JB, Moore AD. Patient-healthcare provider communication: perspectives of African American cancer patients. *Health Psychol.* 2012;31(5):539-547.
31. Penner LA, Dovidio JF, West TV, et al. Aversive racism and medical interactions with black patients: a field study. *J Exp Soc Psychol.* 2010;46(2):436-440.
32. Boulware LE, Cooper LA, Ratner LE, et al. Race and trust in the health care system. *Public Health Rep.* 2003;118(4):358-365.
33. Nguyen GC, LaVeist TA, Harris ML, et al. Patient trust-in-physician and race are predictors of adherence to medical management in inflammatory bowel disease. *Inflamm Bowel Dis.* 2009;15(8):1233-1239.



- 1
- 2
- 3 34. Thompson HS, Valdimarsdottir HB, Winkel G, et al. The Group-Based Medical Mistrust
- 4 Scale: psychometric properties and association with breast cancer screening. *Prev Med.*
- 5 2004;38(2):209-218.
- 6
- 7 35. Bird ST, Bogart LM. Perceived race-based and socioeconomic status(SES)-based
- 8 discrimination in interactions with health care providers. *Ethn Dis.* 2001;11(3):554-563.
- 9
- 10 36. Bird ST, Bogart LM, Delahanty DL. Health-related correlates of perceived discrimination
- 11 in HIV care. *AIDS Patient Care STDS.* 2004;18(1):19-26.
- 12
- 13 37. O'Malley AS, Sheppard VB, Schwartz M, et al. The role of trust in use of preventive
- 14 services among low-income African-American women. *Prev Med.* 2004;38(6):777-785.
- 15
- 16 38. Green AR, Carney DR, Pallin DJ, et al. Implicit bias among physicians and its prediction
- 17 of thrombolysis decisions for black and white patients. *J Gen Intern Med.*
- 18 2007;22(9):1231-1238.
- 19
- 20 39. Hagiwara N, Penner LA, Gonzalez R, et al. Racial attitudes, physician-patient talk time
- 21 ratio, and adherence in racially discordant medical interactions. *Soc Sci Med.*
- 22 2013;87:123-131.
- 23
- 24 40. Cooper LA, Roter DL, Carson KA, et al. The associations of clinicians' implicit attitudes
- 25 about race with medical visit communication and patient ratings of interpersonal care. *Am*
- 26 *J Public Health.* 2012;102(5):979-987.
- 27
- 28 41. Blair IV, Steiner JF, Fairclough DL, et al. Clinicians' implicit ethnic/racial bias and
- 29 perceptions of care among Black and Latino patients. *Ann Fam Med.* 2013;11(1):43-52.
- 30
- 31 42. Hausmann LR, Myaskovsky L, Niyonkuru C, et al. Examining implicit bias of physicians
- 32 who care for individuals with spinal cord injury: A pilot study and future directions. *J*
- 33 *Spinal Cord Med.* 2015;38(1):102-110.
- 34
- 35 43. Hamel LM, Chapman R, Malloy M, et al. Critical shortage of African American medical
- 36 oncologists in the United States. *J Clin Oncol.* 2015;33(32):3697-3700.
- 37
- 38 44. Kirkwood MK, Kosty MP, Bajorin DF, et al. Tracking the workforce: the American
- 39 Society of Clinical Oncology workforce information system. *J Oncol Pract.* 2013;9(1):3-
- 40 8.
- 41
- 42 45. Cooper-Patrick L, Gallo JJ, Gonzales JJ, et al. Race, gender, and partnership in the
- 43 patient-physician relationship. *JAMA.* 1999;282(6):583-589.
- 44
- 45 46. Cooper LA, Roter DL, Johnson RL, et al. Patient-centered communication, ratings of
- 46 care, and concordance of patient and physician race. *Ann Intern Med.* 2003;139(11):907-
- 47 915.
- 48
- 49 47. Johnson RL, Roter D, Powe NR, et al. Patient race/ethnicity and quality of patient-
- 50 physician communication during medical visits. *Am J Public Health.* 2004;94(12):2084-
- 51 2090.
- 52
- 53 48. Street RL, Jr., Gordon H, Haidet P. Physicians' communication and perceptions of
- 54 patients: is it how they look, how they talk, or is it just the doctor? *Soc Sci Med.*
- 55 2007;65(3):586-598.
- 56
- 57 49. Elliott AM, Alexander SC, Mescher CA, et al. Differences in physicians' verbal and
- 58 nonverbal communication With black and white patients at the end of life. *J Pain*
- 59 *Symptom Manage.* 2016;51(1):1-8.
- 60
- 50 50. Penner LA, Gaertner S, Dovidio JF, et al. A social psychological approach to improving
- the outcomes of racially discordant medical interactions. *J Gen Intern Med.*
- 2013;28(9):1143-1149.

- 1
  - 2
  - 3
  - 4
  - 5
  - 6
  - 7
  - 8
  - 9
  - 10
  - 11
  - 12
  - 13
  - 14
  - 15
  - 16
  - 17
  - 18
  - 19
  - 20
  - 21
  - 22
  - 23
  - 24
  - 25
  - 26
  - 27
  - 28
  - 29
  - 30
  - 31
  - 32
  - 33
  - 34
  - 35
  - 36
  - 37
  - 38
  - 39
  - 40
  - 41
  - 42
  - 43
  - 44
  - 45
  - 46
  - 47
  - 48
  - 49
  - 50
  - 51
  - 52
  - 53
  - 54
  - 55
  - 56
  - 57
  - 58
  - 59
  - 60
51. Penner LA, Dovidio JF, Gonzalez R, et al. The effects of oncologist implicit racial bias in racially discordant oncology interactions. *J Clin Oncol*. 2016;34(24):2874-2880.
52. Penner LA, Harper FWK, Dovidio JF, et al. The impact of Black cancer patients' race-related beliefs and attitudes on racially-discordant oncology interactions: A field study. *Soc Sci Med*. 2017;191:99-108.
53. Penner LA, Blair IV, Albrecht TL, et al. Reducing racial health care disparities: a social psychological analysis. *Policy Insights Behav Brain Sci*. 2014;1(1):204-212.
54. Hamel LM, Manning MA, Penner LA, et al. Racial attitudes and nonverbal convergence of patients and physicians in oncology interactions. Published Abstract from the Proceedings of the Society of Behavioral Medicine's Annual Meeting. *Annals Behav Med* 2017;51(1\_suppl):S1742.
55. Richeson JA, Shelton JN. Brief report: Thin slices of racial bias. *J Nonverbal Behav*. 2005;29(1):75-86.
56. Dovidio JF, Kawakami K, Gaertner SL. Implicit and explicit prejudice and interracial interaction. *J Person Soc Psychol*. 2002;82(1):62-68.
57. Dovidio JF, Kawakami K, Johnson C, et al. On the nature of prejudice: Automatic and controlled processes. *J Exper Soc Psychol*. 1997;33(5):510-540.
58. Dovidio JF, LaFrance M. Race, ethnicity, and nonverbal behavior. In: Hall JA, Knapp M, eds. *Nonverbal Communication*. The Hague, The Netherlands: DeGruyter-Mouton; 2013:671-696.
59. Penner LA, Hagiwara N, Eggly S, et al. Racial healthcare disparities: a social psychological analysis. *Eur Rev Soc Psychol*. 2013;24(1):70-122.
60. Kimura M, Daibo I. Interactional synchrony in conversations about emotional episodes: A measurement by "the between-participants pseudosynchrony experimental paradigm". *J Nonverbal Behav*. 2006;30(3):115-126.
61. Condon WS, Ogston WD. Sound film analysis of normal and pathological behavior patterns. *J Nerv Ment Dis*. 1966;143(4):338-347.
62. Ramseyer F, Tschacher W. Nonverbal synchrony or random coincidence? How to tell the difference. *Development of Multimodal Interfaces: Active Listening and Synchrony*. 2010;5967:182-196.
63. Moulder RG, Boker SM, Ramseyer F, et al. Determining synchrony between behavioral time series: An application of surrogate data generation for establishing falsifiable null-hypotheses. *Psychol Methods*. 2018, epub.
64. Ramseyer F, Tschacher W. Synchrony: a core concept for a constructivist approach to psychotherapy. *Constructivism in the Human Sciences*. 2006;11:150-171.
65. Chartrand TL, Lakin JL. The antecedents and consequences of human behavioral mimicry. *Annual Rev Psychol, Vol 64*. 2013;64:285-308.
66. White K, Argo JJ. When imitation doesn't flatter: the role of consumer distinctiveness in responses to mimicry. *J Consumer Res*. 2011;38(4):667-680.
67. Chartrand TL, Maddux WW, Lakin JL. Beyond the perception-behavior link: The ubiquitous utility and motivational moderators of nonconscious mimicry. In: Hassin RR, Uleman JS, Bargh JA, eds. *The New Unconscious*: Oxford University Press; 2005:334-361.
68. Vacharkulksemsuk T, Fredrickson BL. Strangers in sync: achieving embodied rapport through shared movements. *J Exp Soc Psychol*. 2012;48(1):399-402.

- 1  
2  
3 69. Hove MJ, Risen JL. It's all in the timing: interpersonal synchrony increases affiliation. *Soc Cog*. 2009;27(6):949-960.
- 4  
5 70. Miles LK, Griffiths JL, Richardson MJ, et al. Too late to coordinate: contextual  
6 influences on behavioral synchrony. *Eur J Soc Psychol*. 2010;40(1):52-60.
- 7  
8 71. Miles LK, Lumsden J, Richardson MJ, et al. Do birds of a feather move together? Group  
9 membership and behavioral synchrony. *Exp Brain Res*. 2011;211(3-4):495-503.
- 10  
11 72. Sacheli LM, Christensen A, Giese MA, et al. Prejudiced interactions: implicit racial bias  
12 reduces predictive simulation during joint action with an out-group avatar. *Scientific  
13 Reports*. 2015;5.
- 14  
15 73. Paladino MP, Mazzurega M, Pavani F, et al. Synchronous multisensory stimulation blurs  
16 self-other boundaries. *Psychol Sci*. 2010;21(9):1202-1207.
- 17  
18 74. Wiltermuth S. Synchrony and destructive obedience. *Soc Influ*. 2012;7(2):78-89.
- 19  
20 75. Wiltshire TJ, Steffensen SV, Fiore SM. Multiscale movement coordination dynamics in  
21 collaborative team problem solving. *Appl Ergon*. 2018.
- 22  
23 76. Ramseyer F, Tschacher W. Nonverbal synchrony in psychotherapy: coordinated body  
24 movement reflects relationship quality and outcome. *J Consult Clinic Psychol*.  
25 2011;79(3):284-295.
- 26  
27 77. Valdesolo P, Ouyang J, DeSteno D. The rhythm of joint action: synchrony promotes  
28 cooperative ability. *J Exp Soc Psychol*. 2010;46(4):693-695.
- 29  
30 78. Macrae CN, Duffy OK, Miles LK, et al. A case of hand waving: action synchrony and  
31 person perception. *Cognition*. 2008;109(1):152-156.
- 32  
33 79. Miles LK, Nind LK, Henderson Z, et al. Moving memories: behavioral synchrony and  
34 memory for self and others. *J Exp Soc Psychol*. 2010;46(2):457-460.
- 35  
36 80. Albrecht TL, Eggly SS, Gleason ME, et al. Influence of clinical communication on  
37 patients' decision making on participation in clinical trials. *J Clin Oncol*.  
38 2008;26(16):2666-2673.
- 39  
40 81. Eggly S, Hamel LM, Foster TS, et al. Randomized trial of a question prompt list to  
41 increase patient active participation during interactions with black patients and their  
42 oncologists. *Patient Educ Couns*. 2017;100(5):818-826.
- 43  
44 82. Penner LA, Orom H, Albrecht TL, et al. Camera-related behaviors during video recorded  
45 medical interactions. *J Nonverbal Behav*. 2007;31(2):99-117.
- 46  
47 83. Riddle DL, Albrecht TL, Coovert MD, et al. Differences in audiotaped versus videotaped  
48 physician-patient interactions. *J Nonverbal Behav*. 2002;26(4):219-239.
- 49  
50 84. Dugan E, Trachtenberg F, Hall MA. Development of abbreviated measures to assess  
51 patient trust in a physician, a health insurer, and the medical profession. *BMC Health  
52 Serv Res*. 2005;5:64.
- 53  
54 85. Greenwald AG, Nosek BA, Banaji MR. Understanding and using the implicit association  
55 test: I. an improved scoring algorithm. *J Pers Soc Psychol*. 2003;85(2):197-216.
- 56  
57 86. Jacobsen PB. Screening for psychological distress in cancer patients: challenges and  
58 opportunities. *J Clin Oncol*. 2007;25(29):4526-4527.
- 59  
60 87. Stewart M, Brown JB, Weston WW, TR. F. The impact of patient-centered care on  
outcomes. *J Fam Pract*. 2000;49(9):796-804.
88. Ambady N, Rosenthal R. Thin slices of expressive behavior as predictors of interpersonal  
consequences - a Metaanalysis. *Psychol Bull*. 1992;111(2):256-274.
89. Murphy NA. Using thin slices for behavioral coding. *J Nonverbal Behav*.  
2005;29(4):235-246.

- 1
  - 2
  - 3
  - 4
  - 5
  - 6
  - 7
  - 8
  - 9
  - 10
  - 11
  - 12
  - 13
  - 14
  - 15
  - 16
  - 17
  - 18
  - 19
  - 20
  - 21
  - 22
  - 23
  - 24
  - 25
  - 26
  - 27
  - 28
  - 29
  - 30
  - 31
  - 32
  - 33
  - 34
  - 35
  - 36
  - 37
  - 38
  - 39
  - 40
  - 41
  - 42
  - 43
  - 44
  - 45
  - 46
  - 47
  - 48
  - 49
  - 50
  - 51
  - 52
  - 53
  - 54
  - 55
  - 56
  - 57
  - 58
  - 59
  - 60
90. Roter DL, Hall JA, Blanch-Hartigan D, et al. Slicing it thin: new methods for brief sampling analysis using RIAS-coded medical dialogue. *Patient Educ Counsel*. 2011;82(3):410-419.
91. Roter DL, Hall JA, Aoki Y. Physician gender effects in medical communication: a meta-analytic review. *JAMA*. 2002;288(6):756-764.
92. Janssen SM, Lagro-Janssen AL. Physician's gender, communication style, patient preferences and patient satisfaction in gynecology and obstetrics: a systematic review. *Patient Educ Couns*. 2012;89(2):221-226.
93. Schieber AC, Delpierre C, Lepage B, et al. Do gender differences affect the doctor-patient interaction during consultations in general practice? Results from the INTERMEDE study. *Fam Pract*. 2014;31(6):706-713.
94. Inglehart MR. Interactions between patients and dental care providers: does gender matter? *Dent Clin North Am*. 2013;57(2):357-370.
95. Bertakis KD, Azari R. Patient-centered care: the influence of patient and resident physician gender and gender concordance in primary care. *J Womens Health (Larchmt)*. 2012;21(3):326-333.
96. Iacus SM KG, Porro G. Causal inference without balance checking: Coarsened exact matching. *Political Analysis* 2012;20(1):1-24.
97. King GN, R. Why propensity scores should not be used for matching. *Working Paper*. 2016.
98. Austin PC. An introduction to propensity score methods for reducing the effects of confounding in observational studies. *Multivariate Behav Res*. 2011;46(3):399-424.
99. *Motion Energy Analysis (MEA) [Computer software]*. [computer program]. Retrieved from <http://www.psync.ch2016>.
100. Ramseyer F, Tschacher W. Nonverbal synchrony in psychotherapy: Coordinated movement, the therapeutic relationship and outcome. *Internat J Psychol*. 2008;43(3-4):59-59.
101. Boker SM, Xu MQ, Rotondo JL, et al. Windowed cross-correlation and peak picking for the analysis of variability in the association between behavioral time series. *Psychol Methods*. 2002;7(3):338-355.
102. Preacher KJ, Zyphur MJ, Zhang Z. A general multilevel SEM framework for assessing multilevel mediation. *Psychol Methods*. 2010;15(3):209-233.
103. Preacher KJ, Zhang Z, Zyphur MJ. Alternative methods for assessing mediation in multilevel data: the advantages of multilevel SEM. *Structural Equation Modeling-a Multidisciplinary Journal*. 2011;18(2):161-182.

#### Authors' Statement:

LMH: Principal Investigator, involved in all aspects of conceptualization and study design.

RM: Research Assistant, involved in the study design and responsible for design and implementation of statistical analyses.

TLA: Co-Investigator, involved in all aspects of conceptualization and study design.

1  
2  
3 SB: Co-Investigator, involved in all aspects of conceptualization and study design and  
4 responsible for design and implementation of statistical analyses.  
5

6 SE: Co-Investigator, involved in all aspects of conceptualization and study design.  
7

8  
9 LAP: Co-Investigator, involved in all aspects of conceptualization and study design.  
10

11 **Funding:** This work was supported by the National Institutes of Health/National Institute on  
12 Minority Health and Health Disparities 1R21MD011766-01A1 (L. Hamel, PI)  
13

14 **Competing interests statement:** The authors have no competing interests to disclose.  
15  
16  
17  
18  
19  
20  
21  
22  
23  
24  
25  
26  
27  
28  
29  
30  
31  
32  
33  
34  
35  
36  
37  
38  
39  
40  
41  
42  
43  
44  
45  
46  
47  
48  
49  
50  
51  
52  
53  
54  
55  
56  
57  
58  
59  
60

1  
2  
3  
4  
5  
6  
7  
8  
9  
10  
11  
12  
13  
14  
15  
16  
17  
18  
19  
20  
21  
22  
23  
24  
25  
26  
27  
28  
29  
30  
31  
32  
33  
34  
35  
36  
37  
38  
39  
40  
41  
42  
43  
44  
45  
46  
47  
48  
49  
50  
51  
52  
53  
54  
55  
56  
57  
58  
59  
60



262x76mm (300 x 300 DPI)



183x101mm (300 x 300 DPI)





252x76mm (300 x 300 DPI)
